# Supplementary material for: Pesticide peak concentration reduction in a small vegetated treatment system controlled by chemograph shape
Source: Copernicus journal article supplement (doi:10.5194/hess-25-497-2021), 2021-02-02
Supplement: Supplementary file 1 [file hess-25-497-2021-supplement.zip]

Archive with 7 entries (7 files):
- Data_Discharge_G1_5Min.csv
- Text_S1.pdf
- Data_GrabSampling.csv
- hess-25-497-2021-supplement-title-page.pdf
- Data_Discharge_G2_5Min.csv
- Data_FlowEvents.csv
- Figure_S1_MassFlux.pdf
