# Supplementary material for: Pesticide peak concentration reduction in a small vegetated treatment system controlled by chemograph shape
Source: Copernicus journal article supplement (doi:10.5194/hess-25-497-2021), 2021-02-02
Supplement: Supplementary file 1 [file hess-25-497-2021-supplement.zip › Data_Discharge_G1_5Min.csv]

Time	Q [L/s]
01.04.2016 00:00	9.9
01.04.2016 00:05	9.8
01.04.2016 00:10	9.8
01.04.2016 00:15	9.9
01.04.2016 00:20	9.8
01.04.2016 00:25	9.7
01.04.2016 00:30	9.7
01.04.2016 00:35	9.7
01.04.2016 00:40	9.7
01.04.2016 00:45	9.7
01.04.2016 00:50	9.7
01.04.2016 00:55	9.7
01.04.2016 01:00	9.7
01.04.2016 01:05	9.7
01.04.2016 01:10	9.7
01.04.2016 01:15	9.7
01.04.2016 01:20	9.7
01.04.2016 01:25	9.7
01.04.2016 01:30	9.7
01.04.2016 01:35	9.7
01.04.2016 01:40	9.7
01.04.2016 01:45	9.7
01.04.2016 01:50	9.7
01.04.2016 01:55	9.7
01.04.2016 02:00	9.7
01.04.2016 02:05	9.7
01.04.2016 02:10	9.7
01.04.2016 02:15	9.6
01.04.2016 02:20	9.7
01.04.2016 02:25	9.7
01.04.2016 02:30	9.7
01.04.2016 02:35	9.7
01.04.2016 02:40	9.7
01.04.2016 02:45	9.7
01.04.2016 02:50	9.6
01.04.2016 02:55	9.7
01.04.2016 03:00	9.6
01.04.2016 03:05	9.6
01.04.2016 03:10	9.6
01.04.2016 03:15	9.6
01.04.2016 03:20	9.6
01.04.2016 03:25	9.7
01.04.2016 03:30	9.6
01.04.2016 03:35	9.6
01.04.2016 03:40	9.7
01.04.2016 03:45	9.6
01.04.2016 03:50	9.6
01.04.2016 03:55	9.6
01.04.2016 04:00	9.7
01.04.2016 04:05	9.7
01.04.2016 04:10	9.7
01.04.2016 04:15	9.7
01.04.2016 04:20	9.7
01.04.2016 04:25	9.8
01.04.2016 04:30	9.7
01.04.2016 04:35	9.7
01.04.2016 04:40	9.7
01.04.2016 04:45	9.7
01.04.2016 04:50	9.6
01.04.2016 04:55	9.7
01.04.2016 05:00	9.6
01.04.2016 05:05	9.6
01.04.2016 05:10	9.6
01.04.2016 05:15	9.6
01.04.2016 05:20	9.5
01.04.2016 05:25	9.6
01.04.2016 05:30	9.6
01.04.2016 05:35	9.6
01.04.2016 05:40	9.6
01.04.2016 05:45	9.6
01.04.2016 05:50	9.7
01.04.2016 05:55	9.7
01.04.2016 06:00	9.7
01.04.2016 06:05	9.6
01.04.2016 06:10	9.6
01.04.2016 06:15	9.7
01.04.2016 06:20	9.8
01.04.2016 06:25	9.6
01.04.2016 06:30	9.6
01.04.2016 06:35	9.6
01.04.2016 06:40	9.6
01.04.2016 06:45	9.5
01.04.2016 06:50	9.5
01.04.2016 06:55	9.5
01.04.2016 07:00	9.5
01.04.2016 07:05	9.5
01.04.2016 07:10	9.4
01.04.2016 07:15	9.4
01.04.2016 07:20	9.4
01.04.2016 07:25	9.4
01.04.2016 07:30	9.4
01.04.2016 07:35	9.4
01.04.2016 07:40	9.4
01.04.2016 07:45	9.5
01.04.2016 07:50	9.5
01.04.2016 07:55	9.4
01.04.2016 08:00	9.5
01.04.2016 08:05	9.5
01.04.2016 08:10	9.4
01.04.2016 08:15	9.4
01.04.2016 08:20	9.2
01.04.2016 08:25	9.4
01.04.2016 08:30	9.4
01.04.2016 08:35	9.5
01.04.2016 08:40	9.4
01.04.2016 08:45	9.4
01.04.2016 08:50	9.3
01.04.2016 08:55	9.4
01.04.2016 09:00	9.4
01.04.2016 09:05	9.5
01.04.2016 09:10	9.4
01.04.2016 09:15	9.6
01.04.2016 09:20	9.2
01.04.2016 09:25	9.6
01.04.2016 09:30	9.4
01.04.2016 09:35	9.4
01.04.2016 09:40	9.7
01.04.2016 09:45	9.5
01.04.2016 09:50	9.8
01.04.2016 09:55	9.3
01.04.2016 10:00	9.7
01.04.2016 10:05	9.3
01.04.2016 10:10	9.6
01.04.2016 10:15	9.6
01.04.2016 10:20	9.2
01.04.2016 10:25	9.6
01.04.2016 10:30	9.6
01.04.2016 10:35	10.1
01.04.2016 10:40	9.4
01.04.2016 10:45	9.5
01.04.2016 10:50	9.5
01.04.2016 10:55	9.5
01.04.2016 11:00	9.5
01.04.2016 11:05	9.5
01.04.2016 11:10	9.4
01.04.2016 11:15	9.6
01.04.2016 11:20	9.4
01.04.2016 11:25	9.5
01.04.2016 11:30	9.3
01.04.2016 11:35	9.6
01.04.2016 11:40	9.4
01.04.2016 11:45	9.4
01.04.2016 11:50	9.4
01.04.2016 11:55	9.4
01.04.2016 12:00	9.3
01.04.2016 12:05	9.3
01.04.2016 12:10	9.4
01.04.2016 12:15	9.3
01.04.2016 12:20	9.2
01.04.2016 12:25	9.3
01.04.2016 12:30	9.3
01.04.2016 12:35	9.4
01.04.2016 12:40	9.1
01.04.2016 12:45	9.4
01.04.2016 12:50	9.2
01.04.2016 12:55	9.2
01.04.2016 13:00	9.3
01.04.2016 13:05	9.2
01.04.2016 13:10	9.2
01.04.2016 13:15	9.2
01.04.2016 13:20	9.3
01.04.2016 13:25	9.2
01.04.2016 13:30	9.2
01.04.2016 13:35	9.2
01.04.2016 13:40	9.2
01.04.2016 13:45	9.2
01.04.2016 13:50	9.1
01.04.2016 13:55	9.2
01.04.2016 14:00	9.2
01.04.2016 14:05	9.2
01.04.2016 14:10	9.2
01.04.2016 14:15	9.1
01.04.2016 14:20	9.1
01.04.2016 14:25	9.1
01.04.2016 14:30	9.1
01.04.2016 14:35	9.1
01.04.2016 14:40	9.2
01.04.2016 14:45	9.1
01.04.2016 14:50	9.1
01.04.2016 14:55	9.1
01.04.2016 15:00	9.1
01.04.2016 15:05	9.1
01.04.2016 15:10	9.2
01.04.2016 15:15	9.1
01.04.2016 15:20	9
01.04.2016 15:25	9
01.04.2016 15:30	9.2
01.04.2016 15:35	9.1
01.04.2016 15:40	9.3
01.04.2016 15:45	9.2
01.04.2016 15:50	9
01.04.2016 15:55	9.1
01.04.2016 16:00	9.2
01.04.2016 16:05	9.1
01.04.2016 16:10	9.1
01.04.2016 16:15	9.1
01.04.2016 16:20	9.1
01.04.2016 16:25	9.2
01.04.2016 16:30	9.2
01.04.2016 16:35	9.1
01.04.2016 16:40	9.3
01.04.2016 16:45	9.4
01.04.2016 16:50	9.1
01.04.2016 16:55	9.1
01.04.2016 17:00	9.3
01.04.2016 17:05	9.2
01.04.2016 17:10	9.1
01.04.2016 17:15	9.2
01.04.2016 17:20	9.1
01.04.2016 17:25	9.2
01.04.2016 17:30	9.2
01.04.2016 17:35	9.2
01.04.2016 17:40	9.2
01.04.2016 17:45	9.3
01.04.2016 17:50	9.3
01.04.2016 17:55	9.3
01.04.2016 18:00	9.2
01.04.2016 18:05	9.3
01.04.2016 18:10	9.2
01.04.2016 18:15	9.2
01.04.2016 18:20	9.2
01.04.2016 18:25	9.1
01.04.2016 18:30	9.3
01.04.2016 18:35	9.4
01.04.2016 18:40	9.5
01.04.2016 18:45	9.8
01.04.2016 18:50	9.9
01.04.2016 18:55	9.7
01.04.2016 19:00	9.5
01.04.2016 19:05	9.4
01.04.2016 19:10	9.3
01.04.2016 19:15	9.2
01.04.2016 19:20	9.2
01.04.2016 19:25	9.2
01.04.2016 19:30	9.2
01.04.2016 19:35	9.2
01.04.2016 19:40	9.2
01.04.2016 19:45	9.2
01.04.2016 19:50	9.2
01.04.2016 19:55	9.2
01.04.2016 20:00	9.2
01.04.2016 20:05	9.2
01.04.2016 20:10	9.3
01.04.2016 20:15	9.3
01.04.2016 20:20	9.3
01.04.2016 20:25	9.2
01.04.2016 20:30	9.3
01.04.2016 20:35	9.3
01.04.2016 20:40	9.3
01.04.2016 20:45	9.3
01.04.2016 20:50	9.4
01.04.2016 20:55	9.3
01.04.2016 21:00	9.4
01.04.2016 21:05	9.4
01.04.2016 21:10	9.3
01.04.2016 21:15	9.4
01.04.2016 21:20	9.4
01.04.2016 21:25	9.4
01.04.2016 21:30	9.4
01.04.2016 21:35	9.4
01.04.2016 21:40	9.4
01.04.2016 21:45	9.4
01.04.2016 21:50	9.4
01.04.2016 21:55	9.3
01.04.2016 22:00	9.4
01.04.2016 22:05	9.4
01.04.2016 22:10	9.5
01.04.2016 22:15	9.4
01.04.2016 22:20	9.4
01.04.2016 22:25	9.4
01.04.2016 22:30	9.4
01.04.2016 22:35	9.4
01.04.2016 22:40	9.4
01.04.2016 22:45	9.4
01.04.2016 22:50	9.4
01.04.2016 22:55	9.5
01.04.2016 23:00	9.5
01.04.2016 23:05	9.4
01.04.2016 23:10	9.4
01.04.2016 23:15	9.5
01.04.2016 23:20	9.4
01.04.2016 23:25	9.3
01.04.2016 23:30	9.4
01.04.2016 23:35	9.5
01.04.2016 23:40	9.4
01.04.2016 23:45	9.4
01.04.2016 23:50	9.3
01.04.2016 23:55	9.4
02.04.2016 00:00	9.4
02.04.2016 00:05	9.4
02.04.2016 00:10	9.4
02.04.2016 00:15	9.4
02.04.2016 00:20	9.4
02.04.2016 00:25	9.4
02.04.2016 00:30	9.4
02.04.2016 00:35	9.4
02.04.2016 00:40	9.4
02.04.2016 00:45	9.4
02.04.2016 00:50	9.4
02.04.2016 00:55	9.4
02.04.2016 01:00	9.3
02.04.2016 01:05	9.4
02.04.2016 01:10	9.4
02.04.2016 01:15	9.5
02.04.2016 01:20	9.5
02.04.2016 01:25	9.5
02.04.2016 01:30	9.5
02.04.2016 01:35	9.4
02.04.2016 01:40	9.4
02.04.2016 01:45	9.4
02.04.2016 01:50	9.4
02.04.2016 01:55	9.5
02.04.2016 02:00	9.4
02.04.2016 02:05	9.4
02.04.2016 02:10	9.4
02.04.2016 02:15	9.4
02.04.2016 02:20	9.5
02.04.2016 02:25	9.5
02.04.2016 02:30	9.5
02.04.2016 02:35	9.4
02.04.2016 02:40	9.5
02.04.2016 02:45	9.5
02.04.2016 02:50	9.5
02.04.2016 02:55	9.5
02.04.2016 03:00	9.5
02.04.2016 03:05	9.5
02.04.2016 03:10	9.5
02.04.2016 03:15	9.5
02.04.2016 03:20	9.5
02.04.2016 03:25	9.5
02.04.2016 03:30	9.5
02.04.2016 03:35	9.4
02.04.2016 03:40	9.5
02.04.2016 03:45	9.5
02.04.2016 03:50	9.5
02.04.2016 03:55	9.5
02.04.2016 04:00	9.5
02.04.2016 04:05	9.4
02.04.2016 04:10	9.4
02.04.2016 04:15	9.5
02.04.2016 04:20	9.5
02.04.2016 04:25	9.5
02.04.2016 04:30	9.5
02.04.2016 04:35	9.5
02.04.2016 04:40	9.5
02.04.2016 04:45	9.5
02.04.2016 04:50	9.5
02.04.2016 04:55	9.5
02.04.2016 05:00	9.5
02.04.2016 05:05	9.5
02.04.2016 05:10	9.5
02.04.2016 05:15	9.5
02.04.2016 05:20	9.5
02.04.2016 05:25	9.5
02.04.2016 05:30	9.5
02.04.2016 05:35	9.5
02.04.2016 05:40	9.5
02.04.2016 05:45	9.5
02.04.2016 05:50	9.5
02.04.2016 05:55	9.5
02.04.2016 06:00	9.5
02.04.2016 06:05	9.5
02.04.2016 06:10	9.5
02.04.2016 06:15	9.5
02.04.2016 06:20	9.5
02.04.2016 06:25	9.5
02.04.2016 06:30	9.5
02.04.2016 06:35	9.5
02.04.2016 06:40	9.5
02.04.2016 06:45	9.5
02.04.2016 06:50	9.5
02.04.2016 06:55	9.5
02.04.2016 07:00	9.5
02.04.2016 07:05	9.5
02.04.2016 07:10	9.6
02.04.2016 07:15	9.5
02.04.2016 07:20	9.5
02.04.2016 07:25	9.5
02.04.2016 07:30	9.5
02.04.2016 07:35	9.4
02.04.2016 07:40	9.5
02.04.2016 07:45	9.5
02.04.2016 07:50	9.4
02.04.2016 07:55	9.5
02.04.2016 08:00	9.5
02.04.2016 08:05	9.5
02.04.2016 08:10	9.5
02.04.2016 08:15	9.6
02.04.2016 08:20	9.5
02.04.2016 08:25	9.5
02.04.2016 08:30	9.5
02.04.2016 08:35	9.4
02.04.2016 08:40	9.4
02.04.2016 08:45	9.4
02.04.2016 08:50	9.5
02.04.2016 08:55	9.4
02.04.2016 09:00	9.2
02.04.2016 09:05	9.2
02.04.2016 09:10	9.3
02.04.2016 09:15	9.4
02.04.2016 09:20	9.4
02.04.2016 09:25	9.3
02.04.2016 09:30	9.4
02.04.2016 09:35	9.4
02.04.2016 09:40	9.2
02.04.2016 09:45	9.3
02.04.2016 09:50	9.7
02.04.2016 09:55	9.4
02.04.2016 10:00	9.4
02.04.2016 10:05	9.7
02.04.2016 10:10	9.3
02.04.2016 10:15	9.4
02.04.2016 10:20	9.4
02.04.2016 10:25	9.2
02.04.2016 10:30	9.4
02.04.2016 10:35	9.5
02.04.2016 10:40	9.4
02.04.2016 10:45	9.3
02.04.2016 10:50	9.1
02.04.2016 10:55	9
02.04.2016 11:00	9.1
02.04.2016 11:05	8.9
02.04.2016 11:10	8.8
02.04.2016 11:15	8.8
02.04.2016 11:20	8.7
02.04.2016 11:25	8.6
02.04.2016 11:30	8.6
02.04.2016 11:35	8.8
02.04.2016 11:40	8.8
02.04.2016 11:45	8.7
02.04.2016 11:50	8.8
02.04.2016 11:55	8.9
02.04.2016 12:00	8.9
02.04.2016 12:05	8.9
02.04.2016 12:10	9
02.04.2016 12:15	8.8
02.04.2016 12:20	8.9
02.04.2016 12:25	8.9
02.04.2016 12:30	9.1
02.04.2016 12:35	8.9
02.04.2016 12:40	9
02.04.2016 12:45	9.1
02.04.2016 12:50	9.1
02.04.2016 12:55	9
02.04.2016 13:00	8.9
02.04.2016 13:05	8.9
02.04.2016 13:10	9
02.04.2016 13:15	9
02.04.2016 13:20	9
02.04.2016 13:25	9.1
02.04.2016 13:30	9.1
02.04.2016 13:35	9.1
02.04.2016 13:40	9.1
02.04.2016 13:45	9.2
02.04.2016 13:50	9.1
02.04.2016 13:55	9.1
02.04.2016 14:00	9
02.04.2016 14:05	9
02.04.2016 14:10	9
02.04.2016 14:15	9
02.04.2016 14:20	9.1
02.04.2016 14:25	9.1
02.04.2016 14:30	9
02.04.2016 14:35	9
02.04.2016 14:40	9
02.04.2016 14:45	9
02.04.2016 14:50	9
02.04.2016 14:55	9
02.04.2016 15:00	8.9
02.04.2016 15:05	8.9
02.04.2016 15:10	9
02.04.2016 15:15	9
02.04.2016 15:20	9.1
02.04.2016 15:25	8.9
02.04.2016 15:30	8.9
02.04.2016 15:35	9.1
02.04.2016 15:40	9.1
02.04.2016 15:45	9
02.04.2016 15:50	9.1
02.04.2016 15:55	9.1
02.04.2016 16:00	9.1
02.04.2016 16:05	9.1
02.04.2016 16:10	9
02.04.2016 16:15	9.3
02.04.2016 16:20	9.3
02.04.2016 16:25	9
02.04.2016 16:30	9.2
02.04.2016 16:35	9.1
02.04.2016 16:40	9
02.04.2016 16:45	9
02.04.2016 16:50	9.1
02.04.2016 16:55	9
02.04.2016 17:00	9.3
02.04.2016 17:05	9.1
02.04.2016 17:10	9
02.04.2016 17:15	9
02.04.2016 17:20	9.1
02.04.2016 17:25	9
02.04.2016 17:30	9.4
02.04.2016 17:35	9.1
02.04.2016 17:40	9.4
02.04.2016 17:45	9.1
02.04.2016 17:50	9.4
02.04.2016 17:55	9.2
02.04.2016 18:00	9.1
02.04.2016 18:05	9.2
02.04.2016 18:10	9.1
02.04.2016 18:15	9.2
02.04.2016 18:20	9.2
02.04.2016 18:25	9.3
02.04.2016 18:30	9.2
02.04.2016 18:35	9.3
02.04.2016 18:40	9.3
02.04.2016 18:45	9.2
02.04.2016 18:50	9.3
02.04.2016 18:55	9.3
02.04.2016 19:00	9.3
02.04.2016 19:05	9.2
02.04.2016 19:10	9.3
02.04.2016 19:15	9.3
02.04.2016 19:20	9.3
02.04.2016 19:25	9.3
02.04.2016 19:30	9.3
02.04.2016 19:35	9.3
02.04.2016 19:40	9.3
02.04.2016 19:45	9.3
02.04.2016 19:50	9.5
02.04.2016 19:55	9.4
02.04.2016 20:00	9.4
02.04.2016 20:05	9.3
02.04.2016 20:10	9.4
02.04.2016 20:15	9.3
02.04.2016 20:20	9.3
02.04.2016 20:25	9.4
02.04.2016 20:30	9.3
02.04.2016 20:35	9.3
02.04.2016 20:40	9.4
02.04.2016 20:45	9.3
02.04.2016 20:50	9.3
02.04.2016 20:55	9.4
02.04.2016 21:00	9.3
02.04.2016 21:05	9.3
02.04.2016 21:10	9.3
02.04.2016 21:15	9.3
02.04.2016 21:20	9.3
02.04.2016 21:25	9.3
02.04.2016 21:30	9.3
02.04.2016 21:35	9.3
02.04.2016 21:40	9.4
02.04.2016 21:45	9.4
02.04.2016 21:50	9.3
02.04.2016 21:55	9.3
02.04.2016 22:00	9.3
02.04.2016 22:05	9.3
02.04.2016 22:10	9.4
02.04.2016 22:15	9.4
02.04.2016 22:20	9.4
02.04.2016 22:25	9.4
02.04.2016 22:30	9.4
02.04.2016 22:35	9.4
02.04.2016 22:40	9.3
02.04.2016 22:45	9.4
02.04.2016 22:50	9.4
02.04.2016 22:55	9.4
02.04.2016 23:00	9.4
02.04.2016 23:05	9.3
02.04.2016 23:10	9.3
02.04.2016 23:15	9.4
02.04.2016 23:20	9.4
02.04.2016 23:25	9.5
02.04.2016 23:30	9.4
02.04.2016 23:35	9.5
02.04.2016 23:40	9.4
02.04.2016 23:45	9.3
02.04.2016 23:50	9.4
02.04.2016 23:55	9.3
03.04.2016 00:00	9.3
03.04.2016 00:05	9.4
03.04.2016 00:10	9.3
03.04.2016 00:15	9.4
03.04.2016 00:20	9.3
03.04.2016 00:25	9.3
03.04.2016 00:30	9.3
03.04.2016 00:35	9.3
03.04.2016 00:40	9.3
03.04.2016 00:45	9.4
03.04.2016 00:50	9.3
03.04.2016 00:55	9.3
03.04.2016 01:00	9.3
03.04.2016 01:05	9.3
03.04.2016 01:10	9.3
03.04.2016 01:15	9.3
03.04.2016 01:20	9.3
03.04.2016 01:25	9.3
03.04.2016 01:30	9.3
03.04.2016 01:35	9.3
03.04.2016 01:40	9.4
03.04.2016 01:45	9.3
03.04.2016 01:50	9.3
03.04.2016 01:55	9.3
03.04.2016 02:00	9.3
03.04.2016 02:05	9.3
03.04.2016 02:10	9.3
03.04.2016 02:15	9.3
03.04.2016 02:20	9.3
03.04.2016 02:25	9.3
03.04.2016 02:30	9.3
03.04.2016 02:35	9.3
03.04.2016 02:40	9.3
03.04.2016 02:45	9.4
03.04.2016 02:50	9.4
03.04.2016 02:55	9.3
03.04.2016 03:00	9.3
03.04.2016 03:05	9.3
03.04.2016 03:10	9.3
03.04.2016 03:15	9.3
03.04.2016 03:20	9.3
03.04.2016 03:25	9.3
03.04.2016 03:30	9.3
03.04.2016 03:35	9.3
03.04.2016 03:40	9.3
03.04.2016 03:45	9.4
03.04.2016 03:50	9.2
03.04.2016 03:55	9.3
03.04.2016 04:00	9.3
03.04.2016 04:05	9.3
03.04.2016 04:10	9.2
03.04.2016 04:15	9.3
03.04.2016 04:20	9.4
03.04.2016 04:25	9.3
03.04.2016 04:30	9.3
03.04.2016 04:35	9.2
03.04.2016 04:40	9.3
03.04.2016 04:45	9.4
03.04.2016 04:50	9.3
03.04.2016 04:55	9.2
03.04.2016 05:00	9.2
03.04.2016 05:05	9.3
03.04.2016 05:10	9.3
03.04.2016 05:15	9.3
03.04.2016 05:20	9.3
03.04.2016 05:25	9.3
03.04.2016 05:30	9.4
03.04.2016 05:35	9.3
03.04.2016 05:40	9.3
03.04.2016 05:45	9.3
03.04.2016 05:50	9.4
03.04.2016 05:55	9.4
03.04.2016 06:00	9.4
03.04.2016 06:05	9.3
03.04.2016 06:10	9.3
03.04.2016 06:15	9.3
03.04.2016 06:20	9.3
03.04.2016 06:25	9.4
03.04.2016 06:30	9.4
03.04.2016 06:35	9.3
03.04.2016 06:40	9.3
03.04.2016 06:45	9.3
03.04.2016 06:50	9.3
03.04.2016 06:55	9.3
03.04.2016 07:00	9.2
03.04.2016 07:05	9.3
03.04.2016 07:10	9.2
03.04.2016 07:15	9.3
03.04.2016 07:20	9.3
03.04.2016 07:25	9.1
03.04.2016 07:30	9.2
03.04.2016 07:35	8.9
03.04.2016 07:40	8.9
03.04.2016 07:45	9.5
03.04.2016 07:50	9.2
03.04.2016 07:55	9.1
03.04.2016 08:00	9.1
03.04.2016 08:05	9.5
03.04.2016 08:10	9.3
03.04.2016 08:15	9.3
03.04.2016 08:20	9.3
03.04.2016 08:25	9.3
03.04.2016 08:30	9.3
03.04.2016 08:35	9.1
03.04.2016 08:40	9.3
03.04.2016 08:45	9.2
03.04.2016 08:50	9.1
03.04.2016 08:55	9.3
03.04.2016 09:00	9.2
03.04.2016 09:05	9.2
03.04.2016 09:10	9.2
03.04.2016 09:15	9.2
03.04.2016 09:20	9.2
03.04.2016 09:25	9.2
03.04.2016 09:30	9.1
03.04.2016 09:35	9.1
03.04.2016 09:40	9.3
03.04.2016 09:45	9.2
03.04.2016 09:50	9.2
03.04.2016 09:55	9.1
03.04.2016 10:00	9.2
03.04.2016 10:05	9.2
03.04.2016 10:10	9.2
03.04.2016 10:15	9.2
03.04.2016 10:20	9.2
03.04.2016 10:25	9.2
03.04.2016 10:30	9.1
03.04.2016 10:35	9.1
03.04.2016 10:40	9.1
03.04.2016 10:45	8.8
03.04.2016 10:50	8.9
03.04.2016 10:55	8.9
03.04.2016 11:00	9.1
03.04.2016 11:05	9
03.04.2016 11:10	8.9
03.04.2016 11:15	8.7
03.04.2016 11:20	8.7
03.04.2016 11:25	8.8
03.04.2016 11:30	8.7
03.04.2016 11:35	8.5
03.04.2016 11:40	8.6
03.04.2016 11:45	8.7
03.04.2016 11:50	8.7
03.04.2016 11:55	8.7
03.04.2016 12:00	8.6
03.04.2016 12:05	8.6
03.04.2016 12:10	8.6
03.04.2016 12:15	8.5
03.04.2016 12:20	8.6
03.04.2016 12:25	8.5
03.04.2016 12:30	8.6
03.04.2016 12:35	8.4
03.04.2016 12:40	8.5
03.04.2016 12:45	8.4
03.04.2016 12:50	8.4
03.04.2016 12:55	8.5
03.04.2016 13:00	8.3
03.04.2016 13:05	8.4
03.04.2016 13:10	8.4
03.04.2016 13:15	8.4
03.04.2016 13:20	8.4
03.04.2016 13:25	8.2
03.04.2016 13:30	8.4
03.04.2016 13:35	8.3
03.04.2016 13:40	8.4
03.04.2016 13:45	8.4
03.04.2016 13:50	8.5
03.04.2016 13:55	8.4
03.04.2016 14:00	8.3
03.04.2016 14:05	8.4
03.04.2016 14:10	8.3
03.04.2016 14:15	8.3
03.04.2016 14:20	8.4
03.04.2016 14:25	8.4
03.04.2016 14:30	8.4
03.04.2016 14:35	8.3
03.04.2016 14:40	8.3
03.04.2016 14:45	8.3
03.04.2016 14:50	8.3
03.04.2016 14:55	8.3
03.04.2016 15:00	8.4
03.04.2016 15:05	8.3
03.04.2016 15:10	8.4
03.04.2016 15:15	8.3
03.04.2016 15:20	8.4
03.04.2016 15:25	8.3
03.04.2016 15:30	8.1
03.04.2016 15:35	8.4
03.04.2016 15:40	8.5
03.04.2016 15:45	8.3
03.04.2016 15:50	8.5
03.04.2016 15:55	8
03.04.2016 16:00	8.2
03.04.2016 16:05	8.6
03.04.2016 16:10	8.4
03.04.2016 16:15	8.5
03.04.2016 16:20	8.4
03.04.2016 16:25	8.6
03.04.2016 16:30	8.6
03.04.2016 16:35	8.4
03.04.2016 16:40	8.5
03.04.2016 16:45	8.4
03.04.2016 16:50	8.3
03.04.2016 16:55	8.3
03.04.2016 17:00	8.4
03.04.2016 17:05	8.5
03.04.2016 17:10	8.5
03.04.2016 17:15	8.5
03.04.2016 17:20	8.5
03.04.2016 17:25	8.7
03.04.2016 17:30	8.5
03.04.2016 17:35	8.6
03.04.2016 17:40	8.7
03.04.2016 17:45	8.6
03.04.2016 17:50	8.6
03.04.2016 17:55	8.6
03.04.2016 18:00	8.6
03.04.2016 18:05	8.6
03.04.2016 18:10	8.7
03.04.2016 18:15	8.6
03.04.2016 18:20	8.7
03.04.2016 18:25	8.6
03.04.2016 18:30	8.7
03.04.2016 18:35	8.6
03.04.2016 18:40	8.6
03.04.2016 18:45	8.7
03.04.2016 18:50	8.7
03.04.2016 18:55	8.7
03.04.2016 19:00	8.7
03.04.2016 19:05	8.8
03.04.2016 19:10	8.8
03.04.2016 19:15	8.8
03.04.2016 19:20	8.8
03.04.2016 19:25	8.8
03.04.2016 19:30	8.8
03.04.2016 19:35	8.8
03.04.2016 19:40	8.8
03.04.2016 19:45	8.7
03.04.2016 19:50	8.8
03.04.2016 19:55	8.7
03.04.2016 20:00	8.8
03.04.2016 20:05	8.8
03.04.2016 20:10	8.8
03.04.2016 20:15	8.8
03.04.2016 20:20	8.9
03.04.2016 20:25	8.9
03.04.2016 20:30	8.9
03.04.2016 20:35	8.9
03.04.2016 20:40	8.9
03.04.2016 20:45	8.8
03.04.2016 20:50	8.8
03.04.2016 20:55	8.8
03.04.2016 21:00	8.8
03.04.2016 21:05	8.9
03.04.2016 21:10	8.9
03.04.2016 21:15	8.8
03.04.2016 21:20	8.9
03.04.2016 21:25	8.8
03.04.2016 21:30	8.8
03.04.2016 21:35	8.9
03.04.2016 21:40	8.8
03.04.2016 21:45	8.9
03.04.2016 21:50	8.9
03.04.2016 21:55	8.9
03.04.2016 22:00	8.9
03.04.2016 22:05	8.9
03.04.2016 22:10	8.9
03.04.2016 22:15	8.9
03.04.2016 22:20	8.9
03.04.2016 22:25	8.9
03.04.2016 22:30	8.9
03.04.2016 22:35	8.9
03.04.2016 22:40	8.9
03.04.2016 22:45	8.9
03.04.2016 22:50	8.9
03.04.2016 22:55	8.9
03.04.2016 23:00	8.9
03.04.2016 23:05	8.9
03.04.2016 23:10	8.9
03.04.2016 23:15	8.9
03.04.2016 23:20	8.9
03.04.2016 23:25	8.9
03.04.2016 23:30	9
03.04.2016 23:35	8.9
03.04.2016 23:40	8.9
03.04.2016 23:45	9
03.04.2016 23:50	9
03.04.2016 23:55	9
04.04.2016 00:00	8.9
04.04.2016 00:05	8.9
04.04.2016 00:10	8.9
04.04.2016 00:15	9
04.04.2016 00:20	8.9
04.04.2016 00:25	9
04.04.2016 00:30	8.9
04.04.2016 00:35	8.9
04.04.2016 00:40	8.9
04.04.2016 00:45	8.9
04.04.2016 00:50	9
04.04.2016 00:55	9.1
04.04.2016 01:00	9
04.04.2016 01:05	8.9
04.04.2016 01:10	8.9
04.04.2016 01:15	8.9
04.04.2016 01:20	8.9
04.04.2016 01:25	8.9
04.04.2016 01:30	9
04.04.2016 01:35	9
04.04.2016 01:40	8.9
04.04.2016 01:45	9
04.04.2016 01:50	8.9
04.04.2016 01:55	8.9
04.04.2016 02:00	8.9
04.04.2016 02:05	8.9
04.04.2016 02:10	9
04.04.2016 02:15	8.9
04.04.2016 02:20	9
04.04.2016 02:25	9
04.04.2016 02:30	9
04.04.2016 02:35	9
04.04.2016 02:40	8.9
04.04.2016 02:45	9
04.04.2016 02:50	9
04.04.2016 02:55	9.1
04.04.2016 03:00	9
04.04.2016 03:05	9
04.04.2016 03:10	9
04.04.2016 03:15	9.1
04.04.2016 03:20	9.1
04.04.2016 03:25	9.1
04.04.2016 03:30	9.1
04.04.2016 03:35	9.1
04.04.2016 03:40	9
04.04.2016 03:45	9
04.04.2016 03:50	9.1
04.04.2016 03:55	9
04.04.2016 04:00	9.1
04.04.2016 04:05	9
04.04.2016 04:10	9
04.04.2016 04:15	9
04.04.2016 04:20	9
04.04.2016 04:25	9
04.04.2016 04:30	8.9
04.04.2016 04:35	9.1
04.04.2016 04:40	8.9
04.04.2016 04:45	8.9
04.04.2016 04:50	9
04.04.2016 04:55	8.9
04.04.2016 05:00	8.9
04.04.2016 05:05	8.9
04.04.2016 05:10	8.9
04.04.2016 05:15	8.9
04.04.2016 05:20	8.9
04.04.2016 05:25	8.9
04.04.2016 05:30	9
04.04.2016 05:35	8.9
04.04.2016 05:40	9
04.04.2016 05:45	9
04.04.2016 05:50	9
04.04.2016 05:55	9
04.04.2016 06:00	9.1
04.04.2016 06:05	9.1
04.04.2016 06:10	9
04.04.2016 06:15	9.1
04.04.2016 06:20	9.1
04.04.2016 06:25	9
04.04.2016 06:30	9
04.04.2016 06:35	9.1
04.04.2016 06:40	9
04.04.2016 06:45	9
04.04.2016 06:50	9
04.04.2016 06:55	8.9
04.04.2016 07:00	8.9
04.04.2016 07:05	9
04.04.2016 07:10	8.9
04.04.2016 07:15	8.9
04.04.2016 07:20	8.9
04.04.2016 07:25	8.9
04.04.2016 07:30	8.9
04.04.2016 07:35	9
04.04.2016 07:40	9
04.04.2016 07:45	8.9
04.04.2016 07:50	8.9
04.04.2016 07:55	8.9
04.04.2016 08:00	9
04.04.2016 08:05	8.9
04.04.2016 08:10	9
04.04.2016 08:15	9
04.04.2016 08:20	9
04.04.2016 08:25	9.1
04.04.2016 08:30	9.3
04.04.2016 08:35	11.6
04.04.2016 08:40	13.6
04.04.2016 08:45	14.1
04.04.2016 08:50	17.1
04.04.2016 08:55	21.8
04.04.2016 09:00	19.2
04.04.2016 09:05	16.2
04.04.2016 09:10	14.7
04.04.2016 09:15	14.8
04.04.2016 09:20	15.3
04.04.2016 09:25	16.8
04.04.2016 09:30	17.3
04.04.2016 09:35	16.5
04.04.2016 09:40	15.8
04.04.2016 09:45	14.3
04.04.2016 09:50	13.1
04.04.2016 09:55	12.5
04.04.2016 10:00	11.8
04.04.2016 10:05	11.3
04.04.2016 10:10	12
04.04.2016 10:15	11.5
04.04.2016 10:20	10.8
04.04.2016 10:25	10.6
04.04.2016 10:30	10.2
04.04.2016 10:35	10.4
04.04.2016 10:40	10.4
04.04.2016 10:45	10.2
04.04.2016 10:50	10.2
04.04.2016 10:55	10.3
04.04.2016 11:00	10.2
04.04.2016 11:05	10.3
04.04.2016 11:10	10.2
04.04.2016 11:15	10.1
04.04.2016 11:20	10.1
04.04.2016 11:25	9.8
04.04.2016 11:30	9.8
04.04.2016 11:35	9.7
04.04.2016 11:40	9.6
04.04.2016 11:45	9.7
04.04.2016 11:50	9.6
04.04.2016 11:55	9.4
04.04.2016 12:00	9.6
04.04.2016 12:05	9.5
04.04.2016 12:10	9.8
04.04.2016 12:15	9.6
04.04.2016 12:20	9.5
04.04.2016 12:25	9.5
04.04.2016 12:30	9.5
04.04.2016 12:35	9.4
04.04.2016 12:40	9.5
04.04.2016 12:45	9.4
04.04.2016 12:50	9.2
04.04.2016 12:55	9.1
04.04.2016 13:00	9.1
04.04.2016 13:05	9
04.04.2016 13:10	9.1
04.04.2016 13:15	9.1
04.04.2016 13:20	9.1
04.04.2016 13:25	9.2
04.04.2016 13:30	9.1
04.04.2016 13:35	9
04.04.2016 13:40	9
04.04.2016 13:45	8.9
04.04.2016 13:50	9
04.04.2016 13:55	9
04.04.2016 14:00	9.1
04.04.2016 14:05	9.1
04.04.2016 14:10	9.3
04.04.2016 14:15	9
04.04.2016 14:20	9
04.04.2016 14:25	8.9
04.04.2016 14:30	9.1
04.04.2016 14:35	9.1
04.04.2016 14:40	9.1
04.04.2016 14:45	9
04.04.2016 14:50	9
04.04.2016 14:55	9
04.04.2016 15:00	9.1
04.04.2016 15:05	9
04.04.2016 15:10	9
04.04.2016 15:15	9
04.04.2016 15:20	9
04.04.2016 15:25	9.1
04.04.2016 15:30	9
04.04.2016 15:35	9
04.04.2016 15:40	8.7
04.04.2016 15:45	9
04.04.2016 15:50	8.9
04.04.2016 15:55	9.1
04.04.2016 16:00	9
04.04.2016 16:05	9
04.04.2016 16:10	9
04.04.2016 16:15	9
04.04.2016 16:20	9.2
04.04.2016 16:25	8.8
04.04.2016 16:30	9
04.04.2016 16:35	9
04.04.2016 16:40	9
04.04.2016 16:45	9
04.04.2016 16:50	9.1
04.04.2016 16:55	9.1
04.04.2016 17:00	9
04.04.2016 17:05	9
04.04.2016 17:10	9
04.04.2016 17:15	9
04.04.2016 17:20	9.2
04.04.2016 17:25	9.1
04.04.2016 17:30	9.1
04.04.2016 17:35	9.1
04.04.2016 17:40	9.2
04.04.2016 17:45	9.2
04.04.2016 17:50	9.2
04.04.2016 17:55	9.1
04.04.2016 18:00	9
04.04.2016 18:05	9
04.04.2016 18:10	9.1
04.04.2016 18:15	8.9
04.04.2016 18:20	9.1
04.04.2016 18:25	9.1
04.04.2016 18:30	9.1
04.04.2016 18:35	9
04.04.2016 18:40	9.1
04.04.2016 18:45	9.1
04.04.2016 18:50	9.1
04.04.2016 18:55	9.1
04.04.2016 19:00	9.2
04.04.2016 19:05	9.4
04.04.2016 19:10	9.3
04.04.2016 19:15	9.4
04.04.2016 19:20	9.4
04.04.2016 19:25	9.3
04.04.2016 19:30	9.3
04.04.2016 19:35	9.2
04.04.2016 19:40	9.2
04.04.2016 19:45	9.3
04.04.2016 19:50	9.2
04.04.2016 19:55	9.2
04.04.2016 20:00	9.2
04.04.2016 20:05	9.2
04.04.2016 20:10	9.2
04.04.2016 20:15	9.2
04.04.2016 20:20	9.3
04.04.2016 20:25	9.3
04.04.2016 20:30	9.3
04.04.2016 20:35	9.3
04.04.2016 20:40	9.3
04.04.2016 20:45	9.3
04.04.2016 20:50	9.3
04.04.2016 20:55	9.3
04.04.2016 21:00	9.3
04.04.2016 21:05	9.3
04.04.2016 21:10	9.3
04.04.2016 21:15	9.2
04.04.2016 21:20	9.2
04.04.2016 21:25	9.3
04.04.2016 21:30	9.3
04.04.2016 21:35	9.2
04.04.2016 21:40	9.3
04.04.2016 21:45	9.3
04.04.2016 21:50	9.3
04.04.2016 21:55	9.3
04.04.2016 22:00	9.2
04.04.2016 22:05	9.3
04.04.2016 22:10	9.3
04.04.2016 22:15	9.4
04.04.2016 22:20	9.4
04.04.2016 22:25	9.3
04.04.2016 22:30	9.3
04.04.2016 22:35	9.3
04.04.2016 22:40	9.3
04.04.2016 22:45	9.3
04.04.2016 22:50	9.4
04.04.2016 22:55	9.3
04.04.2016 23:00	9.3
04.04.2016 23:05	9.4
04.04.2016 23:10	9.3
04.04.2016 23:15	9.4
04.04.2016 23:20	9.4
04.04.2016 23:25	9.3
04.04.2016 23:30	9.3
04.04.2016 23:35	9.3
04.04.2016 23:40	9.3
04.04.2016 23:45	9.3
04.04.2016 23:50	9.3
04.04.2016 23:55	9.3
05.04.2016 00:00	9.3
05.04.2016 00:05	9.3
05.04.2016 00:10	9.3
05.04.2016 00:15	9.3
05.04.2016 00:20	9.3
05.04.2016 00:25	9.3
05.04.2016 00:30	9.3
05.04.2016 00:35	9.4
05.04.2016 00:40	9.3
05.04.2016 00:45	9.3
05.04.2016 00:50	9.3
05.04.2016 00:55	9.3
05.04.2016 01:00	9.3
05.04.2016 01:05	9.3
05.04.2016 01:10	9.3
05.04.2016 01:15	9.4
05.04.2016 01:20	9.3
05.04.2016 01:25	9.3
05.04.2016 01:30	9.2
05.04.2016 01:35	9.2
05.04.2016 01:40	9.2
05.04.2016 01:45	9.2
05.04.2016 01:50	9.2
05.04.2016 01:55	9.2
05.04.2016 02:00	9.2
05.04.2016 02:05	9.2
05.04.2016 02:10	9.2
05.04.2016 02:15	9.2
05.04.2016 02:20	9.2
05.04.2016 02:25	9.2
05.04.2016 02:30	9.2
05.04.2016 02:35	9.2
05.04.2016 02:40	9.1
05.04.2016 02:45	9.2
05.04.2016 02:50	9.2
05.04.2016 02:55	9.2
05.04.2016 03:00	9.1
05.04.2016 03:05	9.2
05.04.2016 03:10	9.1
05.04.2016 03:15	9.2
05.04.2016 03:20	9.3
05.04.2016 03:25	9.4
05.04.2016 03:30	9.3
05.04.2016 03:35	9.3
05.04.2016 03:40	9.3
05.04.2016 03:45	9.3
05.04.2016 03:50	9.3
05.04.2016 03:55	9.3
05.04.2016 04:00	9.3
05.04.2016 04:05	9.2
05.04.2016 04:10	9.2
05.04.2016 04:15	9.2
05.04.2016 04:20	9.2
05.04.2016 04:25	9.2
05.04.2016 04:30	9.2
05.04.2016 04:35	9.2
05.04.2016 04:40	9.2
05.04.2016 04:45	9.3
05.04.2016 04:50	9.3
05.04.2016 04:55	9.2
05.04.2016 05:00	9.2
05.04.2016 05:05	9.3
05.04.2016 05:10	9.2
05.04.2016 05:15	9.2
05.04.2016 05:20	9.2
05.04.2016 05:25	9.3
05.04.2016 05:30	9.2
05.04.2016 05:35	9.2
05.04.2016 05:40	9.3
05.04.2016 05:45	9.2
05.04.2016 05:50	9.2
05.04.2016 05:55	9.3
05.04.2016 06:00	9.2
05.04.2016 06:05	9.3
05.04.2016 06:10	9.2
05.04.2016 06:15	9.3
05.04.2016 06:20	9.3
05.04.2016 06:25	9.2
05.04.2016 06:30	9.2
05.04.2016 06:35	9.2
05.04.2016 06:40	9.2
05.04.2016 06:45	9.2
05.04.2016 06:50	9.1
05.04.2016 06:55	9.2
05.04.2016 07:00	9.2
05.04.2016 07:05	9.2
05.04.2016 07:10	9.2
05.04.2016 07:15	9.2
05.04.2016 07:20	9.1
05.04.2016 07:25	9.1
05.04.2016 07:30	9.2
05.04.2016 07:35	9.1
05.04.2016 07:40	9
05.04.2016 07:45	9.2
05.04.2016 07:50	9
05.04.2016 07:55	9
05.04.2016 08:00	9.3
05.04.2016 08:05	9.2
05.04.2016 08:10	8.9
05.04.2016 08:15	9.1
05.04.2016 08:20	9.1
05.04.2016 08:25	9.1
05.04.2016 08:30	9.1
05.04.2016 08:35	9.3
05.04.2016 08:40	9.3
05.04.2016 08:45	9
05.04.2016 08:50	9.3
05.04.2016 08:55	9.3
05.04.2016 09:00	9.3
05.04.2016 09:05	9
05.04.2016 09:10	9.7
05.04.2016 09:15	9.5
05.04.2016 09:20	9.4
05.04.2016 09:25	9.7
05.04.2016 09:30	9.4
05.04.2016 09:35	9.8
05.04.2016 09:40	9.8
05.04.2016 09:45	9.6
05.04.2016 09:50	9.7
05.04.2016 09:55	9.6
05.04.2016 10:00	9.6
05.04.2016 10:05	9.7
05.04.2016 10:10	10.2
05.04.2016 10:15	9.7
05.04.2016 10:20	9.8
05.04.2016 10:25	9.6
05.04.2016 10:30	9.7
05.04.2016 10:35	10.1
05.04.2016 10:40	9.9
05.04.2016 10:45	9.9
05.04.2016 10:50	10
05.04.2016 10:55	10
05.04.2016 11:00	9.7
05.04.2016 11:05	10.3
05.04.2016 11:10	10.1
05.04.2016 11:15	10.2
05.04.2016 11:20	10.6
05.04.2016 11:25	10.4
05.04.2016 11:30	10.3
05.04.2016 11:35	10.4
05.04.2016 11:40	10.2
05.04.2016 11:45	10.7
05.04.2016 11:50	10.6
05.04.2016 11:55	10.7
05.04.2016 12:00	10.8
05.04.2016 12:05	10.7
05.04.2016 12:10	11.1
05.04.2016 12:15	10.6
05.04.2016 12:20	11
05.04.2016 12:25	10.8
05.04.2016 12:30	10.9
05.04.2016 12:35	10.8
05.04.2016 12:40	10.9
05.04.2016 12:45	11
05.04.2016 12:50	11.1
05.04.2016 12:55	10.6
05.04.2016 13:00	10.6
05.04.2016 13:05	10.4
05.04.2016 13:10	10.9
05.04.2016 13:15	10.7
05.04.2016 13:20	10.4
05.04.2016 13:25	10.5
05.04.2016 13:30	10.9
05.04.2016 13:35	10.9
05.04.2016 13:40	10.4
05.04.2016 13:45	10.8
05.04.2016 13:50	11
05.04.2016 13:55	11.6
05.04.2016 14:00	12.5
05.04.2016 14:05	12.5
05.04.2016 14:10	13.6
05.04.2016 14:15	13.8
05.04.2016 14:20	14.2
05.04.2016 14:25	14.8
05.04.2016 14:30	16.6
05.04.2016 14:35	17.3
05.04.2016 14:40	16.4
05.04.2016 14:45	16.5
05.04.2016 14:50	16.3
05.04.2016 14:55	15.9
05.04.2016 15:00	16.4
05.04.2016 15:05	16.8
05.04.2016 15:10	17.7
05.04.2016 15:15	18.2
05.04.2016 15:20	18.8
05.04.2016 15:25	20.8
05.04.2016 15:30	21
05.04.2016 15:35	22.8
05.04.2016 15:40	24.2
05.04.2016 15:45	24
05.04.2016 15:50	25.4
05.04.2016 15:55	23.5
05.04.2016 16:00	23.4
05.04.2016 16:05	27.7
05.04.2016 16:10	26.3
05.04.2016 16:15	27.6
05.04.2016 16:20	26.4
05.04.2016 16:25	27.3
05.04.2016 16:30	26.1
05.04.2016 16:35	25.8
05.04.2016 16:40	25.4
05.04.2016 16:45	25.6
05.04.2016 16:50	25.7
05.04.2016 16:55	25.3
05.04.2016 17:00	24.7
05.04.2016 17:05	24.1
05.04.2016 17:10	23.8
05.04.2016 17:15	24.1
05.04.2016 17:20	24.3
05.04.2016 17:25	25
05.04.2016 17:30	26.6
05.04.2016 17:35	28.4
05.04.2016 17:40	29.5
05.04.2016 17:45	30.5
05.04.2016 17:50	31
05.04.2016 17:55	31.4
05.04.2016 18:00	32.4
05.04.2016 18:05	32.6
05.04.2016 18:10	32.5
05.04.2016 18:15	32.1
05.04.2016 18:20	31.6
05.04.2016 18:25	31.2
05.04.2016 18:30	31.2
05.04.2016 18:35	31.8
05.04.2016 18:40	34.4
05.04.2016 18:45	40.8
05.04.2016 18:50	54.6
05.04.2016 18:55	72.2
05.04.2016 19:00	86.3
05.04.2016 19:05	115
05.04.2016 19:10	113.9
05.04.2016 19:15	106.3
05.04.2016 19:20	102
05.04.2016 19:25	101.7
05.04.2016 19:30	98.9
05.04.2016 19:35	95.9
05.04.2016 19:40	91.4
05.04.2016 19:45	87.7
05.04.2016 19:50	84.7
05.04.2016 19:55	82
05.04.2016 20:00	80.4
05.04.2016 20:05	81.8
05.04.2016 20:10	81.7
05.04.2016 20:15	81.2
05.04.2016 20:20	79.5
05.04.2016 20:25	76.4
05.04.2016 20:30	73.8
05.04.2016 20:35	70
05.04.2016 20:40	67.1
05.04.2016 20:45	65
05.04.2016 20:50	62.3
05.04.2016 20:55	61.1
05.04.2016 21:00	59
05.04.2016 21:05	58.7
05.04.2016 21:10	57.2
05.04.2016 21:15	55.8
05.04.2016 21:20	56.8
05.04.2016 21:25	54.1
05.04.2016 21:30	54.4
05.04.2016 21:35	53.8
05.04.2016 21:40	51.6
05.04.2016 21:45	50.3
05.04.2016 21:50	49.1
05.04.2016 21:55	47.1
05.04.2016 22:00	45.3
05.04.2016 22:05	44.6
05.04.2016 22:10	43.2
05.04.2016 22:15	41.9
05.04.2016 22:20	40.5
05.04.2016 22:25	40.1
05.04.2016 22:30	40
05.04.2016 22:35	39.1
05.04.2016 22:40	38.8
05.04.2016 22:45	38.6
05.04.2016 22:50	38.4
05.04.2016 22:55	37.9
05.04.2016 23:00	37.7
05.04.2016 23:05	36.8
05.04.2016 23:10	36.6
05.04.2016 23:15	36.1
05.04.2016 23:20	35.8
05.04.2016 23:25	35.3
05.04.2016 23:30	34.7
05.04.2016 23:35	34.4
05.04.2016 23:40	34.2
05.04.2016 23:45	33.7
05.04.2016 23:50	32.8
05.04.2016 23:55	32.7
06.04.2016 00:00	31.9
06.04.2016 00:05	31.4
06.04.2016 00:10	31.2
06.04.2016 00:15	30.7
06.04.2016 00:20	30.4
06.04.2016 00:25	29.9
06.04.2016 00:30	29.6
06.04.2016 00:35	29.4
06.04.2016 00:40	29.1
06.04.2016 00:45	29
06.04.2016 00:50	28.5
06.04.2016 00:55	28.6
06.04.2016 01:00	28.4
06.04.2016 01:05	28
06.04.2016 01:10	27.8
06.04.2016 01:15	27.5
06.04.2016 01:20	27.4
06.04.2016 01:25	27
06.04.2016 01:30	26.8
06.04.2016 01:35	26.6
06.04.2016 01:40	26.4
06.04.2016 01:45	26.5
06.04.2016 01:50	26.1
06.04.2016 01:55	25.9
06.04.2016 02:00	25.9
06.04.2016 02:05	25.8
06.04.2016 02:10	25.5
06.04.2016 02:15	25.4
06.04.2016 02:20	25.1
06.04.2016 02:25	25
06.04.2016 02:30	24.9
06.04.2016 02:35	24.7
06.04.2016 02:40	24.7
06.04.2016 02:45	24.4
06.04.2016 02:50	24.4
06.04.2016 02:55	24.2
06.04.2016 03:00	24.1
06.04.2016 03:05	23.9
06.04.2016 03:10	23.8
06.04.2016 03:15	23.7
06.04.2016 03:20	23.6
06.04.2016 03:25	23.4
06.04.2016 03:30	23.4
06.04.2016 03:35	23.3
06.04.2016 03:40	23.1
06.04.2016 03:45	23.2
06.04.2016 03:50	23
06.04.2016 03:55	23
06.04.2016 04:00	22.8
06.04.2016 04:05	22.8
06.04.2016 04:10	22.7
06.04.2016 04:15	22.6
06.04.2016 04:20	22.5
06.04.2016 04:25	22.4
06.04.2016 04:30	22.3
06.04.2016 04:35	22.2
06.04.2016 04:40	22.1
06.04.2016 04:45	22
06.04.2016 04:50	22
06.04.2016 04:55	21.9
06.04.2016 05:00	21.9
06.04.2016 05:05	21.8
06.04.2016 05:10	21.6
06.04.2016 05:15	21.6
06.04.2016 05:20	21.6
06.04.2016 05:25	21.6
06.04.2016 05:30	21.6
06.04.2016 05:35	21.8
06.04.2016 05:40	21.9
06.04.2016 05:45	21.6
06.04.2016 05:50	21.6
06.04.2016 05:55	21.6
06.04.2016 06:00	21.6
06.04.2016 06:05	21.7
06.04.2016 06:10	21.8
06.04.2016 06:15	21.9
06.04.2016 06:20	21.9
06.04.2016 06:25	22
06.04.2016 06:30	21.9
06.04.2016 06:35	21.8
06.04.2016 06:40	21.7
06.04.2016 06:45	21.8
06.04.2016 06:50	21.6
06.04.2016 06:55	21.5
06.04.2016 07:00	21.4
06.04.2016 07:05	21.2
06.04.2016 07:10	21.1
06.04.2016 07:15	20.9
06.04.2016 07:20	20.9
06.04.2016 07:25	20.8
06.04.2016 07:30	20.7
06.04.2016 07:35	20.7
06.04.2016 07:40	20.6
06.04.2016 07:45	21
06.04.2016 07:50	20.5
06.04.2016 07:55	19.9
06.04.2016 08:00	20.2
06.04.2016 08:05	20.3
06.04.2016 08:10	20.4
06.04.2016 08:15	20.1
06.04.2016 08:20	19.9
06.04.2016 08:25	19.9
06.04.2016 08:30	20.1
06.04.2016 08:35	19.8
06.04.2016 08:40	19.6
06.04.2016 08:45	19.6
06.04.2016 08:50	19.4
06.04.2016 08:55	19.6
06.04.2016 09:00	19.3
06.04.2016 09:05	19.7
06.04.2016 09:10	19.6
06.04.2016 09:15	19.8
06.04.2016 09:20	19.7
06.04.2016 09:25	19.7
06.04.2016 09:30	19.8
06.04.2016 09:35	19.5
06.04.2016 09:40	19.2
06.04.2016 09:45	19.3
06.04.2016 09:50	19.5
06.04.2016 09:55	19.3
06.04.2016 10:00	19.2
06.04.2016 10:05	19.2
06.04.2016 10:10	19.2
06.04.2016 10:15	19.1
06.04.2016 10:20	18.9
06.04.2016 10:25	19.2
06.04.2016 10:30	18.7
06.04.2016 10:35	18.9
06.04.2016 10:40	18.8
06.04.2016 10:45	18.6
06.04.2016 10:50	18.7
06.04.2016 10:55	18.4
06.04.2016 11:00	18.4
06.04.2016 11:05	18.6
06.04.2016 11:10	18.7
06.04.2016 11:15	18.6
06.04.2016 11:20	18.4
06.04.2016 11:25	18.4
06.04.2016 11:30	18.4
06.04.2016 11:35	18.3
06.04.2016 11:40	18.3
06.04.2016 11:45	18.3
06.04.2016 11:50	18.3
06.04.2016 11:55	18.2
06.04.2016 12:00	18
06.04.2016 12:05	18.4
06.04.2016 12:10	18.1
06.04.2016 12:15	18.1
06.04.2016 12:20	18.1
06.04.2016 12:25	18.1
06.04.2016 12:30	18
06.04.2016 12:35	17.9
06.04.2016 12:40	17.9
06.04.2016 12:45	17.7
06.04.2016 12:50	17.8
06.04.2016 12:55	17.7
06.04.2016 13:00	17.8
06.04.2016 13:05	17.7
06.04.2016 13:10	17.9
06.04.2016 13:15	17.3
06.04.2016 13:20	17.5
06.04.2016 13:25	17.3
06.04.2016 13:30	17.2
06.04.2016 13:35	17.1
06.04.2016 13:40	17.2
06.04.2016 13:45	17
06.04.2016 13:50	16.6
06.04.2016 13:55	16.8
06.04.2016 14:00	16.7
06.04.2016 14:05	16.6
06.04.2016 14:10	16.7
06.04.2016 14:15	16.6
06.04.2016 14:20	16.6
06.04.2016 14:25	16.8
06.04.2016 14:30	16.8
06.04.2016 14:35	16.3
06.04.2016 14:40	16.7
06.04.2016 14:45	16.6
06.04.2016 14:50	16.5
06.04.2016 14:55	16.5
06.04.2016 15:00	16.4
06.04.2016 15:05	16.5
06.04.2016 15:10	16.4
06.04.2016 15:15	16.5
06.04.2016 15:20	16.4
06.04.2016 15:25	16.3
06.04.2016 15:30	16.3
06.04.2016 15:35	16.4
06.04.2016 15:40	16.3
06.04.2016 15:45	16.2
06.04.2016 15:50	16.1
06.04.2016 15:55	16.2
06.04.2016 16:00	16.3
06.04.2016 16:05	16.3
06.04.2016 16:10	16.2
06.04.2016 16:15	16
06.04.2016 16:20	16.1
06.04.2016 16:25	16.1
06.04.2016 16:30	16.1
06.04.2016 16:35	16.1
06.04.2016 16:40	16.1
06.04.2016 16:45	16.1
06.04.2016 16:50	16.2
06.04.2016 16:55	16.2
06.04.2016 17:00	16.1
06.04.2016 17:05	16.4
06.04.2016 17:10	16.4
06.04.2016 17:15	15.9
06.04.2016 17:20	15.9
06.04.2016 17:25	16
06.04.2016 17:30	16.1
06.04.2016 17:35	16
06.04.2016 17:40	15.8
06.04.2016 17:45	16.2
06.04.2016 17:50	16.1
06.04.2016 17:55	16
06.04.2016 18:00	16.1
06.04.2016 18:05	15.9
06.04.2016 18:10	16.1
06.04.2016 18:15	16.1
06.04.2016 18:20	16.1
06.04.2016 18:25	16.1
06.04.2016 18:30	16.1
06.04.2016 18:35	16
06.04.2016 18:40	15.9
06.04.2016 18:45	15.9
06.04.2016 18:50	15.9
06.04.2016 18:55	16
06.04.2016 19:00	16
06.04.2016 19:05	15.9
06.04.2016 19:10	16.1
06.04.2016 19:15	16
06.04.2016 19:20	16
06.04.2016 19:25	15.9
06.04.2016 19:30	15.9
06.04.2016 19:35	15.9
06.04.2016 19:40	15.9
06.04.2016 19:45	16
06.04.2016 19:50	15.9
06.04.2016 19:55	15.9
06.04.2016 20:00	16
06.04.2016 20:05	15.9
06.04.2016 20:10	15.8
06.04.2016 20:15	15.9
06.04.2016 20:20	15.9
06.04.2016 20:25	15.7
06.04.2016 20:30	15.7
06.04.2016 20:35	15.7
06.04.2016 20:40	15.8
06.04.2016 20:45	15.8
06.04.2016 20:50	15.9
06.04.2016 20:55	15.7
06.04.2016 21:00	15.8
06.04.2016 21:05	15.6
06.04.2016 21:10	15.9
06.04.2016 21:15	15.9
06.04.2016 21:20	15.7
06.04.2016 21:25	15.5
06.04.2016 21:30	15.6
06.04.2016 21:35	15.6
06.04.2016 21:40	15.6
06.04.2016 21:45	15.6
06.04.2016 21:50	15.5
06.04.2016 21:55	15.4
06.04.2016 22:00	15.6
06.04.2016 22:05	15.5
06.04.2016 22:10	15.6
06.04.2016 22:15	15.7
06.04.2016 22:20	15.7
06.04.2016 22:25	15.7
06.04.2016 22:30	15.7
06.04.2016 22:35	15.6
06.04.2016 22:40	15.6
06.04.2016 22:45	15.6
06.04.2016 22:50	15.5
06.04.2016 22:55	15.5
06.04.2016 23:00	15.5
06.04.2016 23:05	15.6
06.04.2016 23:10	15.6
06.04.2016 23:15	15.5
06.04.2016 23:20	15.4
06.04.2016 23:25	15.4
06.04.2016 23:30	15.4
06.04.2016 23:35	15.4
06.04.2016 23:40	15.4
06.04.2016 23:45	15.5
06.04.2016 23:50	15.3
06.04.2016 23:55	15.5
07.04.2016 00:00	15.5
07.04.2016 00:05	15.3
07.04.2016 00:10	15.3
07.04.2016 00:15	15.2
07.04.2016 00:20	15.3
07.04.2016 00:25	15.3
07.04.2016 00:30	15.2
07.04.2016 00:35	15.2
07.04.2016 00:40	15.2
07.04.2016 00:45	15.2
07.04.2016 00:50	15.2
07.04.2016 00:55	15.2
07.04.2016 01:00	15.2
07.04.2016 01:05	15.2
07.04.2016 01:10	15.2
07.04.2016 01:15	15.2
07.04.2016 01:20	15.1
07.04.2016 01:25	15.1
07.04.2016 01:30	15.2
07.04.2016 01:35	15.2
07.04.2016 01:40	15.2
07.04.2016 01:45	15.1
07.04.2016 01:50	15.2
07.04.2016 01:55	15.1
07.04.2016 02:00	15.1
07.04.2016 02:05	15.1
07.04.2016 02:10	15.3
07.04.2016 02:15	15.1
07.04.2016 02:20	15.1
07.04.2016 02:25	15.2
07.04.2016 02:30	15.1
07.04.2016 02:35	15.1
07.04.2016 02:40	15.1
07.04.2016 02:45	15.2
07.04.2016 02:50	15.2
07.04.2016 02:55	15.2
07.04.2016 03:00	15.1
07.04.2016 03:05	15.2
07.04.2016 03:10	15.1
07.04.2016 03:15	15.1
07.04.2016 03:20	15.1
07.04.2016 03:25	15.1
07.04.2016 03:30	15.1
07.04.2016 03:35	15.2
07.04.2016 03:40	15
07.04.2016 03:45	15.1
07.04.2016 03:50	15
07.04.2016 03:55	15.1
07.04.2016 04:00	15
07.04.2016 04:05	15.1
07.04.2016 04:10	15
07.04.2016 04:15	15.1
07.04.2016 04:20	15.1
07.04.2016 04:25	15.1
07.04.2016 04:30	15.1
07.04.2016 04:35	14.9
07.04.2016 04:40	14.9
07.04.2016 04:45	14.9
07.04.2016 04:50	14.9
07.04.2016 04:55	14.8
07.04.2016 05:00	14.8
07.04.2016 05:05	15
07.04.2016 05:10	14.9
07.04.2016 05:15	14.8
07.04.2016 05:20	14.8
07.04.2016 05:25	14.8
07.04.2016 05:30	14.8
07.04.2016 05:35	14.8
07.04.2016 05:40	14.7
07.04.2016 05:45	14.8
07.04.2016 05:50	14.7
07.04.2016 05:55	14.7
07.04.2016 06:00	14.6
07.04.2016 06:05	14.8
07.04.2016 06:10	14.7
07.04.2016 06:15	14.6
07.04.2016 06:20	14.6
07.04.2016 06:25	14.6
07.04.2016 06:30	14.6
07.04.2016 06:35	14.6
07.04.2016 06:40	14.6
07.04.2016 06:45	14.6
07.04.2016 06:50	14.6
07.04.2016 06:55	14.6
07.04.2016 07:00	14.5
07.04.2016 07:05	14.5
07.04.2016 07:10	14.6
07.04.2016 07:15	14.5
07.04.2016 07:20	14.5
07.04.2016 07:25	14.4
07.04.2016 07:30	14.5
07.04.2016 07:35	14.6
07.04.2016 07:40	14.5
07.04.2016 07:45	14.5
07.04.2016 07:50	14.5
07.04.2016 07:55	14.5
07.04.2016 08:00	14.5
07.04.2016 08:05	14.5
07.04.2016 08:10	14.4
07.04.2016 08:15	14.3
07.04.2016 08:20	14.3
07.04.2016 08:25	14.3
07.04.2016 08:30	14.4
07.04.2016 08:35	14.3
07.04.2016 08:40	14.4
07.04.2016 08:45	14.3
07.04.2016 08:50	14.3
07.04.2016 08:55	14.4
07.04.2016 09:00	14.3
07.04.2016 09:05	14.1
07.04.2016 09:10	14.2
07.04.2016 09:15	14.2
07.04.2016 09:20	14.2
07.04.2016 09:25	14.3
07.04.2016 09:30	14.4
07.04.2016 09:35	13.6
07.04.2016 09:40	14.6
07.04.2016 09:45	14.2
07.04.2016 09:50	14.4
07.04.2016 09:55	14.4
07.04.2016 10:00	14.1
07.04.2016 10:05	14.2
07.04.2016 10:10	14.3
07.04.2016 10:15	14.2
07.04.2016 10:20	14.8
07.04.2016 10:25	14.2
07.04.2016 10:30	14.3
07.04.2016 10:35	14.1
07.04.2016 10:40	14.3
07.04.2016 10:45	14.4
07.04.2016 10:50	14.1
07.04.2016 10:55	14.2
07.04.2016 11:00	14.4
07.04.2016 11:05	14.1
07.04.2016 11:10	14.2
07.04.2016 11:15	14.4
07.04.2016 11:20	13.8
07.04.2016 11:25	14.2
07.04.2016 11:30	14.2
07.04.2016 11:35	14.2
07.04.2016 11:40	13.9
07.04.2016 11:45	14.1
07.04.2016 11:50	14.1
07.04.2016 11:55	14
07.04.2016 12:00	14.2
07.04.2016 12:05	13.6
07.04.2016 12:10	13.7
07.04.2016 12:15	13.7
07.04.2016 12:20	14
07.04.2016 12:25	14.2
07.04.2016 12:30	13.8
07.04.2016 12:35	13.9
07.04.2016 12:40	13.8
07.04.2016 12:45	13.9
07.04.2016 12:50	14.1
07.04.2016 12:55	14
07.04.2016 13:00	14
07.04.2016 13:05	14
07.04.2016 13:10	14.1
07.04.2016 13:15	13.7
07.04.2016 13:20	13.9
07.04.2016 13:25	14
07.04.2016 13:30	13.9
07.04.2016 13:35	14.1
07.04.2016 13:40	14
07.04.2016 13:45	14.1
07.04.2016 13:50	13.9
07.04.2016 13:55	14.1
07.04.2016 14:00	14.1
07.04.2016 14:05	14.1
07.04.2016 14:10	14.2
07.04.2016 14:15	14.1
07.04.2016 14:20	13.9
07.04.2016 14:25	14
07.04.2016 14:30	13.8
07.04.2016 14:35	13.7
07.04.2016 14:40	13.8
07.04.2016 14:45	13.7
07.04.2016 14:50	14
07.04.2016 14:55	13.9
07.04.2016 15:00	13.8
07.04.2016 15:05	13.9
07.04.2016 15:10	13.9
07.04.2016 15:15	13.9
07.04.2016 15:20	13.9
07.04.2016 15:25	13.8
07.04.2016 15:30	13.9
07.04.2016 15:35	14
07.04.2016 15:40	13.9
07.04.2016 15:45	13.8
07.04.2016 15:50	13.9
07.04.2016 15:55	13.9
07.04.2016 16:00	13.9
07.04.2016 16:05	14
07.04.2016 16:10	13.8
07.04.2016 16:15	13.8
07.04.2016 16:20	13.9
07.04.2016 16:25	13.9
07.04.2016 16:30	13.7
07.04.2016 16:35	13.9
07.04.2016 16:40	14
07.04.2016 16:45	14
07.04.2016 16:50	13.9
07.04.2016 16:55	13.9
07.04.2016 17:00	13.9
07.04.2016 17:05	13.7
07.04.2016 17:10	13.8
07.04.2016 17:15	13.8
07.04.2016 17:20	13.9
07.04.2016 17:25	13.9
07.04.2016 17:30	13.8
07.04.2016 17:35	13.6
07.04.2016 17:40	13.6
07.04.2016 17:45	13.7
07.04.2016 17:50	13.8
07.04.2016 17:55	13.8
07.04.2016 18:00	13.6
07.04.2016 18:05	13.5
07.04.2016 18:10	13.7
07.04.2016 18:15	13.7
07.04.2016 18:20	13.6
07.04.2016 18:25	13.7
07.04.2016 18:30	13.8
07.04.2016 18:35	13.8
07.04.2016 18:40	13.7
07.04.2016 18:45	13.7
07.04.2016 18:50	13.7
07.04.2016 18:55	13.7
07.04.2016 19:00	13.7
07.04.2016 19:05	13.8
07.04.2016 19:10	13.6
07.04.2016 19:15	13.6
07.04.2016 19:20	13.7
07.04.2016 19:25	13.6
07.04.2016 19:30	13.6
07.04.2016 19:35	13.6
07.04.2016 19:40	13.6
07.04.2016 19:45	13.6
07.04.2016 19:50	13.6
07.04.2016 19:55	13.6
07.04.2016 20:00	13.7
07.04.2016 20:05	13.9
07.04.2016 20:10	13.8
07.04.2016 20:15	13.7
07.04.2016 20:20	13.6
07.04.2016 20:25	13.6
07.04.2016 20:30	13.6
07.04.2016 20:35	13.6
07.04.2016 20:40	13.5
07.04.2016 20:45	13.5
07.04.2016 20:50	13.5
07.04.2016 20:55	13.4
07.04.2016 21:00	13.4
07.04.2016 21:05	13.4
07.04.2016 21:10	13.5
07.04.2016 21:15	13.4
07.04.2016 21:20	13.4
07.04.2016 21:25	13.5
07.04.2016 21:30	13.4
07.04.2016 21:35	13.5
07.04.2016 21:40	13.4
07.04.2016 21:45	13.5
07.04.2016 21:50	13.4
07.04.2016 21:55	13.4
07.04.2016 22:00	13.4
07.04.2016 22:05	13.4
07.04.2016 22:10	13.4
07.04.2016 22:15	13.4
07.04.2016 22:20	13.4
07.04.2016 22:25	13.3
07.04.2016 22:30	13.4
[truncated: 147,186 more rows]
