# Supplementary material for: Pesticide peak concentration reduction in a small vegetated treatment system controlled by chemograph shape
Source: Copernicus journal article supplement (doi:10.5194/hess-25-497-2021), 2021-02-02
Supplement: Supplementary file 1 [file hess-25-497-2021-supplement.zip › Data_Discharge_G2_5Min.csv]

Time	Q [L/s]
01.04.2016 00:00	0
01.04.2016 00:05	0
01.04.2016 00:10	0
01.04.2016 00:15	0
01.04.2016 00:20	0
01.04.2016 00:25	0
01.04.2016 00:30	0
01.04.2016 00:35	0
01.04.2016 00:40	0
01.04.2016 00:45	0
01.04.2016 00:50	0
01.04.2016 00:55	0
01.04.2016 01:00	0
01.04.2016 01:05	0
01.04.2016 01:10	0
01.04.2016 01:15	0
01.04.2016 01:20	0
01.04.2016 01:25	0
01.04.2016 01:30	0
01.04.2016 01:35	0
01.04.2016 01:40	0
01.04.2016 01:45	0
01.04.2016 01:50	0
01.04.2016 01:55	0
01.04.2016 02:00	0
01.04.2016 02:05	0
01.04.2016 02:10	0
01.04.2016 02:15	0
01.04.2016 02:20	0
01.04.2016 02:25	0
01.04.2016 02:30	0
01.04.2016 02:35	0
01.04.2016 02:40	0
01.04.2016 02:45	0
01.04.2016 02:50	0
01.04.2016 02:55	0
01.04.2016 03:00	0
01.04.2016 03:05	0
01.04.2016 03:10	0
01.04.2016 03:15	0
01.04.2016 03:20	0
01.04.2016 03:25	0
01.04.2016 03:30	0
01.04.2016 03:35	0
01.04.2016 03:40	0
01.04.2016 03:45	0
01.04.2016 03:50	0
01.04.2016 03:55	0
01.04.2016 04:00	0
01.04.2016 04:05	0
01.04.2016 04:10	0
01.04.2016 04:15	0
01.04.2016 04:20	0
01.04.2016 04:25	0
01.04.2016 04:30	0
01.04.2016 04:35	0
01.04.2016 04:40	0
01.04.2016 04:45	0
01.04.2016 04:50	0
01.04.2016 04:55	0
01.04.2016 05:00	0
01.04.2016 05:05	0
01.04.2016 05:10	0
01.04.2016 05:15	0
01.04.2016 05:20	0
01.04.2016 05:25	0
01.04.2016 05:30	0
01.04.2016 05:35	0
01.04.2016 05:40	0
01.04.2016 05:45	0
01.04.2016 05:50	0
01.04.2016 05:55	0
01.04.2016 06:00	0
01.04.2016 06:05	0
01.04.2016 06:10	0
01.04.2016 06:15	0
01.04.2016 06:20	0
01.04.2016 06:25	0
01.04.2016 06:30	0
01.04.2016 06:35	0
01.04.2016 06:40	0
01.04.2016 06:45	0
01.04.2016 06:50	0
01.04.2016 06:55	0
01.04.2016 07:00	0
01.04.2016 07:05	0
01.04.2016 07:10	0
01.04.2016 07:15	0
01.04.2016 07:20	0
01.04.2016 07:25	0
01.04.2016 07:30	0
01.04.2016 07:35	0
01.04.2016 07:40	0
01.04.2016 07:45	0
01.04.2016 07:50	0
01.04.2016 07:55	0
01.04.2016 08:00	0
01.04.2016 08:05	0
01.04.2016 08:10	0
01.04.2016 08:15	0
01.04.2016 08:20	0
01.04.2016 08:25	0
01.04.2016 08:30	0
01.04.2016 08:35	0
01.04.2016 08:40	0
01.04.2016 08:45	0
01.04.2016 08:50	0
01.04.2016 08:55	0
01.04.2016 09:00	0
01.04.2016 09:05	0
01.04.2016 09:10	0
01.04.2016 09:15	0
01.04.2016 09:20	0
01.04.2016 09:25	0
01.04.2016 09:30	0
01.04.2016 09:35	0
01.04.2016 09:40	0
01.04.2016 09:45	0
01.04.2016 09:50	0
01.04.2016 09:55	0
01.04.2016 10:00	0
01.04.2016 10:05	0
01.04.2016 10:10	0
01.04.2016 10:15	0
01.04.2016 10:20	0
01.04.2016 10:25	0
01.04.2016 10:30	0
01.04.2016 10:35	0
01.04.2016 10:40	0
01.04.2016 10:45	0
01.04.2016 10:50	0
01.04.2016 10:55	0
01.04.2016 11:00	0
01.04.2016 11:05	0
01.04.2016 11:10	0
01.04.2016 11:15	0
01.04.2016 11:20	0
01.04.2016 11:25	0
01.04.2016 11:30	0
01.04.2016 11:35	0
01.04.2016 11:40	0
01.04.2016 11:45	0
01.04.2016 11:50	0
01.04.2016 11:55	0
01.04.2016 12:00	0
01.04.2016 12:05	0
01.04.2016 12:10	0
01.04.2016 12:15	0
01.04.2016 12:20	0
01.04.2016 12:25	0
01.04.2016 12:30	0
01.04.2016 12:35	0
01.04.2016 12:40	0
01.04.2016 12:45	0
01.04.2016 12:50	0
01.04.2016 12:55	0
01.04.2016 13:00	0
01.04.2016 13:05	0
01.04.2016 13:10	0
01.04.2016 13:15	0
01.04.2016 13:20	0
01.04.2016 13:25	0
01.04.2016 13:30	0
01.04.2016 13:35	0
01.04.2016 13:40	0
01.04.2016 13:45	0
01.04.2016 13:50	0
01.04.2016 13:55	0
01.04.2016 14:00	0
01.04.2016 14:05	0
01.04.2016 14:10	0
01.04.2016 14:15	0
01.04.2016 14:20	0
01.04.2016 14:25	0
01.04.2016 14:30	0
01.04.2016 14:35	0
01.04.2016 14:40	0
01.04.2016 14:45	0
01.04.2016 14:50	0
01.04.2016 14:55	0
01.04.2016 15:00	0
01.04.2016 15:05	0
01.04.2016 15:10	0
01.04.2016 15:15	0
01.04.2016 15:20	0
01.04.2016 15:25	0
01.04.2016 15:30	0
01.04.2016 15:35	0
01.04.2016 15:40	0
01.04.2016 15:45	0
01.04.2016 15:50	0
01.04.2016 15:55	0
01.04.2016 16:00	0
01.04.2016 16:05	0
01.04.2016 16:10	0
01.04.2016 16:15	0
01.04.2016 16:20	0
01.04.2016 16:25	0
01.04.2016 16:30	0
01.04.2016 16:35	0
01.04.2016 16:40	0
01.04.2016 16:45	0
01.04.2016 16:50	0
01.04.2016 16:55	0
01.04.2016 17:00	0
01.04.2016 17:05	0
01.04.2016 17:10	0
01.04.2016 17:15	0
01.04.2016 17:20	0
01.04.2016 17:25	0
01.04.2016 17:30	0
01.04.2016 17:35	0
01.04.2016 17:40	0
01.04.2016 17:45	0
01.04.2016 17:50	0
01.04.2016 17:55	0
01.04.2016 18:00	0
01.04.2016 18:05	0
01.04.2016 18:10	0
01.04.2016 18:15	0
01.04.2016 18:20	0
01.04.2016 18:25	0
01.04.2016 18:30	0
01.04.2016 18:35	0
01.04.2016 18:40	0
01.04.2016 18:45	0
01.04.2016 18:50	0
01.04.2016 18:55	0
01.04.2016 19:00	0
01.04.2016 19:05	0
01.04.2016 19:10	0
01.04.2016 19:15	0
01.04.2016 19:20	0
01.04.2016 19:25	0
01.04.2016 19:30	0
01.04.2016 19:35	0
01.04.2016 19:40	0
01.04.2016 19:45	0
01.04.2016 19:50	0
01.04.2016 19:55	0
01.04.2016 20:00	0
01.04.2016 20:05	0
01.04.2016 20:10	0
01.04.2016 20:15	0
01.04.2016 20:20	0
01.04.2016 20:25	0
01.04.2016 20:30	0
01.04.2016 20:35	0
01.04.2016 20:40	0
01.04.2016 20:45	0
01.04.2016 20:50	0
01.04.2016 20:55	0
01.04.2016 21:00	0
01.04.2016 21:05	0
01.04.2016 21:10	0
01.04.2016 21:15	0
01.04.2016 21:20	0
01.04.2016 21:25	0
01.04.2016 21:30	0
01.04.2016 21:35	0
01.04.2016 21:40	0
01.04.2016 21:45	0
01.04.2016 21:50	0
01.04.2016 21:55	0
01.04.2016 22:00	0
01.04.2016 22:05	0
01.04.2016 22:10	0
01.04.2016 22:15	0
01.04.2016 22:20	0
01.04.2016 22:25	0
01.04.2016 22:30	0
01.04.2016 22:35	0
01.04.2016 22:40	0
01.04.2016 22:45	0
01.04.2016 22:50	0
01.04.2016 22:55	0
01.04.2016 23:00	0
01.04.2016 23:05	0
01.04.2016 23:10	0
01.04.2016 23:15	0
01.04.2016 23:20	0
01.04.2016 23:25	0
01.04.2016 23:30	0
01.04.2016 23:35	0
01.04.2016 23:40	0
01.04.2016 23:45	0
01.04.2016 23:50	0
01.04.2016 23:55	0
02.04.2016 00:00	0
02.04.2016 00:05	0
02.04.2016 00:10	0
02.04.2016 00:15	0
02.04.2016 00:20	0
02.04.2016 00:25	0
02.04.2016 00:30	0
02.04.2016 00:35	0
02.04.2016 00:40	0
02.04.2016 00:45	0
02.04.2016 00:50	0
02.04.2016 00:55	0
02.04.2016 01:00	0
02.04.2016 01:05	0
02.04.2016 01:10	0
02.04.2016 01:15	0
02.04.2016 01:20	0
02.04.2016 01:25	0
02.04.2016 01:30	0
02.04.2016 01:35	0
02.04.2016 01:40	0
02.04.2016 01:45	0
02.04.2016 01:50	0
02.04.2016 01:55	0
02.04.2016 02:00	0
02.04.2016 02:05	0
02.04.2016 02:10	0
02.04.2016 02:15	0
02.04.2016 02:20	0
02.04.2016 02:25	0
02.04.2016 02:30	0
02.04.2016 02:35	0
02.04.2016 02:40	0
02.04.2016 02:45	0
02.04.2016 02:50	0
02.04.2016 02:55	0
02.04.2016 03:00	0
02.04.2016 03:05	0
02.04.2016 03:10	0
02.04.2016 03:15	0
02.04.2016 03:20	0
02.04.2016 03:25	0
02.04.2016 03:30	0
02.04.2016 03:35	0
02.04.2016 03:40	0
02.04.2016 03:45	0
02.04.2016 03:50	0
02.04.2016 03:55	0
02.04.2016 04:00	0
02.04.2016 04:05	0
02.04.2016 04:10	0
02.04.2016 04:15	0
02.04.2016 04:20	0
02.04.2016 04:25	0
02.04.2016 04:30	0
02.04.2016 04:35	0
02.04.2016 04:40	0
02.04.2016 04:45	0
02.04.2016 04:50	0
02.04.2016 04:55	0
02.04.2016 05:00	0
02.04.2016 05:05	0
02.04.2016 05:10	0
02.04.2016 05:15	0
02.04.2016 05:20	0
02.04.2016 05:25	0
02.04.2016 05:30	0
02.04.2016 05:35	0
02.04.2016 05:40	0
02.04.2016 05:45	0
02.04.2016 05:50	0
02.04.2016 05:55	0
02.04.2016 06:00	0
02.04.2016 06:05	0
02.04.2016 06:10	0
02.04.2016 06:15	0
02.04.2016 06:20	0
02.04.2016 06:25	0
02.04.2016 06:30	0
02.04.2016 06:35	0
02.04.2016 06:40	0
02.04.2016 06:45	0
02.04.2016 06:50	0
02.04.2016 06:55	0
02.04.2016 07:00	0
02.04.2016 07:05	0
02.04.2016 07:10	0
02.04.2016 07:15	0
02.04.2016 07:20	0
02.04.2016 07:25	0
02.04.2016 07:30	0
02.04.2016 07:35	0
02.04.2016 07:40	0
02.04.2016 07:45	0
02.04.2016 07:50	0
02.04.2016 07:55	0
02.04.2016 08:00	0
02.04.2016 08:05	0
02.04.2016 08:10	0
02.04.2016 08:15	0
02.04.2016 08:20	0
02.04.2016 08:25	0
02.04.2016 08:30	0
02.04.2016 08:35	0
02.04.2016 08:40	0
02.04.2016 08:45	0
02.04.2016 08:50	0
02.04.2016 08:55	0
02.04.2016 09:00	0
02.04.2016 09:05	0
02.04.2016 09:10	0
02.04.2016 09:15	0
02.04.2016 09:20	0
02.04.2016 09:25	0
02.04.2016 09:30	0
02.04.2016 09:35	0
02.04.2016 09:40	0
02.04.2016 09:45	0
02.04.2016 09:50	0
02.04.2016 09:55	0
02.04.2016 10:00	0
02.04.2016 10:05	0
02.04.2016 10:10	0
02.04.2016 10:15	0
02.04.2016 10:20	0
02.04.2016 10:25	0
02.04.2016 10:30	0
02.04.2016 10:35	0
02.04.2016 10:40	0
02.04.2016 10:45	0
02.04.2016 10:50	0
02.04.2016 10:55	0
02.04.2016 11:00	0
02.04.2016 11:05	0
02.04.2016 11:10	0
02.04.2016 11:15	0
02.04.2016 11:20	0
02.04.2016 11:25	0
02.04.2016 11:30	0
02.04.2016 11:35	0
02.04.2016 11:40	0
02.04.2016 11:45	0
02.04.2016 11:50	0
02.04.2016 11:55	0
02.04.2016 12:00	0
02.04.2016 12:05	0
02.04.2016 12:10	0
02.04.2016 12:15	0
02.04.2016 12:20	0
02.04.2016 12:25	0
02.04.2016 12:30	0
02.04.2016 12:35	0
02.04.2016 12:40	0
02.04.2016 12:45	0
02.04.2016 12:50	0
02.04.2016 12:55	0
02.04.2016 13:00	0
02.04.2016 13:05	0
02.04.2016 13:10	0
02.04.2016 13:15	0
02.04.2016 13:20	0
02.04.2016 13:25	0
02.04.2016 13:30	0
02.04.2016 13:35	0
02.04.2016 13:40	0
02.04.2016 13:45	0
02.04.2016 13:50	0
02.04.2016 13:55	0
02.04.2016 14:00	0
02.04.2016 14:05	0
02.04.2016 14:10	0
02.04.2016 14:15	0
02.04.2016 14:20	0
02.04.2016 14:25	0
02.04.2016 14:30	0
02.04.2016 14:35	0
02.04.2016 14:40	0
02.04.2016 14:45	0
02.04.2016 14:50	0
02.04.2016 14:55	0
02.04.2016 15:00	0
02.04.2016 15:05	0
02.04.2016 15:10	0
02.04.2016 15:15	0
02.04.2016 15:20	0
02.04.2016 15:25	0
02.04.2016 15:30	0
02.04.2016 15:35	0
02.04.2016 15:40	0
02.04.2016 15:45	0
02.04.2016 15:50	0
02.04.2016 15:55	0
02.04.2016 16:00	0
02.04.2016 16:05	0
02.04.2016 16:10	0
02.04.2016 16:15	0
02.04.2016 16:20	0
02.04.2016 16:25	0
02.04.2016 16:30	0
02.04.2016 16:35	0
02.04.2016 16:40	0
02.04.2016 16:45	0
02.04.2016 16:50	0
02.04.2016 16:55	0
02.04.2016 17:00	0
02.04.2016 17:05	0
02.04.2016 17:10	0
02.04.2016 17:15	0
02.04.2016 17:20	0
02.04.2016 17:25	0
02.04.2016 17:30	0
02.04.2016 17:35	0
02.04.2016 17:40	0
02.04.2016 17:45	0
02.04.2016 17:50	0
02.04.2016 17:55	0
02.04.2016 18:00	0
02.04.2016 18:05	0
02.04.2016 18:10	0
02.04.2016 18:15	0
02.04.2016 18:20	0
02.04.2016 18:25	0
02.04.2016 18:30	0
02.04.2016 18:35	0
02.04.2016 18:40	0
02.04.2016 18:45	0
02.04.2016 18:50	0
02.04.2016 18:55	0
02.04.2016 19:00	0
02.04.2016 19:05	0
02.04.2016 19:10	0
02.04.2016 19:15	0
02.04.2016 19:20	0
02.04.2016 19:25	0
02.04.2016 19:30	0
02.04.2016 19:35	0
02.04.2016 19:40	0
02.04.2016 19:45	0
02.04.2016 19:50	0
02.04.2016 19:55	0
02.04.2016 20:00	0
02.04.2016 20:05	0
02.04.2016 20:10	0
02.04.2016 20:15	0
02.04.2016 20:20	0
02.04.2016 20:25	0
02.04.2016 20:30	0
02.04.2016 20:35	0
02.04.2016 20:40	0
02.04.2016 20:45	0
02.04.2016 20:50	0
02.04.2016 20:55	0
02.04.2016 21:00	0
02.04.2016 21:05	0
02.04.2016 21:10	0
02.04.2016 21:15	0
02.04.2016 21:20	0
02.04.2016 21:25	0
02.04.2016 21:30	0
02.04.2016 21:35	0
02.04.2016 21:40	0
02.04.2016 21:45	0
02.04.2016 21:50	0
02.04.2016 21:55	0
02.04.2016 22:00	0
02.04.2016 22:05	0
02.04.2016 22:10	0
02.04.2016 22:15	0
02.04.2016 22:20	0
02.04.2016 22:25	0
02.04.2016 22:30	0
02.04.2016 22:35	0
02.04.2016 22:40	0
02.04.2016 22:45	0
02.04.2016 22:50	0
02.04.2016 22:55	0
02.04.2016 23:00	0
02.04.2016 23:05	0
02.04.2016 23:10	0
02.04.2016 23:15	0
02.04.2016 23:20	0
02.04.2016 23:25	0
02.04.2016 23:30	0
02.04.2016 23:35	0
02.04.2016 23:40	0
02.04.2016 23:45	0
02.04.2016 23:50	0
02.04.2016 23:55	0
03.04.2016 00:00	0
03.04.2016 00:05	0
03.04.2016 00:10	0
03.04.2016 00:15	0
03.04.2016 00:20	0
03.04.2016 00:25	0
03.04.2016 00:30	0
03.04.2016 00:35	0
03.04.2016 00:40	0
03.04.2016 00:45	0
03.04.2016 00:50	0
03.04.2016 00:55	0
03.04.2016 01:00	0
03.04.2016 01:05	0
03.04.2016 01:10	0
03.04.2016 01:15	0
03.04.2016 01:20	0
03.04.2016 01:25	0
03.04.2016 01:30	0
03.04.2016 01:35	0
03.04.2016 01:40	0
03.04.2016 01:45	0
03.04.2016 01:50	0
03.04.2016 01:55	0
03.04.2016 02:00	0
03.04.2016 02:05	0
03.04.2016 02:10	0
03.04.2016 02:15	0
03.04.2016 02:20	0
03.04.2016 02:25	0
03.04.2016 02:30	0
03.04.2016 02:35	0
03.04.2016 02:40	0
03.04.2016 02:45	0
03.04.2016 02:50	0
03.04.2016 02:55	0
03.04.2016 03:00	0
03.04.2016 03:05	0
03.04.2016 03:10	0
03.04.2016 03:15	0
03.04.2016 03:20	0
03.04.2016 03:25	0
03.04.2016 03:30	0
03.04.2016 03:35	0
03.04.2016 03:40	0
03.04.2016 03:45	0
03.04.2016 03:50	0
03.04.2016 03:55	0
03.04.2016 04:00	0
03.04.2016 04:05	0
03.04.2016 04:10	0
03.04.2016 04:15	0
03.04.2016 04:20	0
03.04.2016 04:25	0
03.04.2016 04:30	0
03.04.2016 04:35	0
03.04.2016 04:40	0
03.04.2016 04:45	0
03.04.2016 04:50	0
03.04.2016 04:55	0
03.04.2016 05:00	0
03.04.2016 05:05	0
03.04.2016 05:10	0
03.04.2016 05:15	0
03.04.2016 05:20	0
03.04.2016 05:25	0
03.04.2016 05:30	0
03.04.2016 05:35	0
03.04.2016 05:40	0
03.04.2016 05:45	0
03.04.2016 05:50	0
03.04.2016 05:55	0
03.04.2016 06:00	0
03.04.2016 06:05	0
03.04.2016 06:10	0
03.04.2016 06:15	0
03.04.2016 06:20	0
03.04.2016 06:25	0
03.04.2016 06:30	0
03.04.2016 06:35	0
03.04.2016 06:40	0
03.04.2016 06:45	0
03.04.2016 06:50	0
03.04.2016 06:55	0
03.04.2016 07:00	0
03.04.2016 07:05	0
03.04.2016 07:10	0
03.04.2016 07:15	0
03.04.2016 07:20	0
03.04.2016 07:25	0
03.04.2016 07:30	0
03.04.2016 07:35	0
03.04.2016 07:40	0
03.04.2016 07:45	0
03.04.2016 07:50	0
03.04.2016 07:55	0
03.04.2016 08:00	0
03.04.2016 08:05	0
03.04.2016 08:10	0
03.04.2016 08:15	0
03.04.2016 08:20	0
03.04.2016 08:25	0
03.04.2016 08:30	0
03.04.2016 08:35	0
03.04.2016 08:40	0
03.04.2016 08:45	0
03.04.2016 08:50	0
03.04.2016 08:55	0
03.04.2016 09:00	0
03.04.2016 09:05	0
03.04.2016 09:10	0
03.04.2016 09:15	0
03.04.2016 09:20	0
03.04.2016 09:25	0
03.04.2016 09:30	0
03.04.2016 09:35	0
03.04.2016 09:40	0
03.04.2016 09:45	0
03.04.2016 09:50	0
03.04.2016 09:55	0
03.04.2016 10:00	0
03.04.2016 10:05	0
03.04.2016 10:10	0
03.04.2016 10:15	0
03.04.2016 10:20	0
03.04.2016 10:25	0
03.04.2016 10:30	0
03.04.2016 10:35	0
03.04.2016 10:40	0
03.04.2016 10:45	0
03.04.2016 10:50	0
03.04.2016 10:55	0
03.04.2016 11:00	0
03.04.2016 11:05	0
03.04.2016 11:10	0
03.04.2016 11:15	0
03.04.2016 11:20	0
03.04.2016 11:25	0
03.04.2016 11:30	0
03.04.2016 11:35	0
03.04.2016 11:40	0
03.04.2016 11:45	0
03.04.2016 11:50	0
03.04.2016 11:55	0
03.04.2016 12:00	0
03.04.2016 12:05	0
03.04.2016 12:10	0
03.04.2016 12:15	0
03.04.2016 12:20	0
03.04.2016 12:25	0
03.04.2016 12:30	0
03.04.2016 12:35	0
03.04.2016 12:40	0
03.04.2016 12:45	0
03.04.2016 12:50	0
03.04.2016 12:55	0
03.04.2016 13:00	0
03.04.2016 13:05	0
03.04.2016 13:10	0
03.04.2016 13:15	0
03.04.2016 13:20	0
03.04.2016 13:25	0
03.04.2016 13:30	0
03.04.2016 13:35	0
03.04.2016 13:40	0
03.04.2016 13:45	0
03.04.2016 13:50	0
03.04.2016 13:55	0
03.04.2016 14:00	0
03.04.2016 14:05	0
03.04.2016 14:10	0
03.04.2016 14:15	0
03.04.2016 14:20	0
03.04.2016 14:25	0
03.04.2016 14:30	0
03.04.2016 14:35	0
03.04.2016 14:40	0
03.04.2016 14:45	0
03.04.2016 14:50	0
03.04.2016 14:55	0
03.04.2016 15:00	0
03.04.2016 15:05	0
03.04.2016 15:10	0
03.04.2016 15:15	0
03.04.2016 15:20	0
03.04.2016 15:25	0
03.04.2016 15:30	0
03.04.2016 15:35	0
03.04.2016 15:40	0
03.04.2016 15:45	0
03.04.2016 15:50	0
03.04.2016 15:55	0
03.04.2016 16:00	0
03.04.2016 16:05	0
03.04.2016 16:10	0
03.04.2016 16:15	0
03.04.2016 16:20	0
03.04.2016 16:25	0
03.04.2016 16:30	0
03.04.2016 16:35	0
03.04.2016 16:40	0
03.04.2016 16:45	0
03.04.2016 16:50	0
03.04.2016 16:55	0
03.04.2016 17:00	0
03.04.2016 17:05	0
03.04.2016 17:10	0
03.04.2016 17:15	0
03.04.2016 17:20	0
03.04.2016 17:25	0
03.04.2016 17:30	0
03.04.2016 17:35	0
03.04.2016 17:40	0
03.04.2016 17:45	0
03.04.2016 17:50	0
03.04.2016 17:55	0
03.04.2016 18:00	0
03.04.2016 18:05	0
03.04.2016 18:10	0
03.04.2016 18:15	0
03.04.2016 18:20	0
03.04.2016 18:25	0
03.04.2016 18:30	0
03.04.2016 18:35	0
03.04.2016 18:40	0
03.04.2016 18:45	0
03.04.2016 18:50	0
03.04.2016 18:55	0
03.04.2016 19:00	0
03.04.2016 19:05	0
03.04.2016 19:10	0
03.04.2016 19:15	0
03.04.2016 19:20	0
03.04.2016 19:25	0
03.04.2016 19:30	0
03.04.2016 19:35	0
03.04.2016 19:40	0
03.04.2016 19:45	0
03.04.2016 19:50	0
03.04.2016 19:55	0
03.04.2016 20:00	0
03.04.2016 20:05	0
03.04.2016 20:10	0
03.04.2016 20:15	0
03.04.2016 20:20	0
03.04.2016 20:25	0
03.04.2016 20:30	0
03.04.2016 20:35	0
03.04.2016 20:40	0
03.04.2016 20:45	0
03.04.2016 20:50	0
03.04.2016 20:55	0
03.04.2016 21:00	0
03.04.2016 21:05	0
03.04.2016 21:10	0
03.04.2016 21:15	0
03.04.2016 21:20	0
03.04.2016 21:25	0
03.04.2016 21:30	0
03.04.2016 21:35	0
03.04.2016 21:40	0
03.04.2016 21:45	0
03.04.2016 21:50	0
03.04.2016 21:55	0
03.04.2016 22:00	0
03.04.2016 22:05	0
03.04.2016 22:10	0
03.04.2016 22:15	0
03.04.2016 22:20	0
03.04.2016 22:25	0
03.04.2016 22:30	0
03.04.2016 22:35	0
03.04.2016 22:40	0
03.04.2016 22:45	0
03.04.2016 22:50	0
03.04.2016 22:55	0
03.04.2016 23:00	0
03.04.2016 23:05	0
03.04.2016 23:10	0
03.04.2016 23:15	0
03.04.2016 23:20	0
03.04.2016 23:25	0
03.04.2016 23:30	0
03.04.2016 23:35	0
03.04.2016 23:40	0
03.04.2016 23:45	0
03.04.2016 23:50	0
03.04.2016 23:55	0
04.04.2016 00:00	0
04.04.2016 00:05	0
04.04.2016 00:10	0
04.04.2016 00:15	0
04.04.2016 00:20	0
04.04.2016 00:25	0
04.04.2016 00:30	0
04.04.2016 00:35	0
04.04.2016 00:40	0
04.04.2016 00:45	0
04.04.2016 00:50	0
04.04.2016 00:55	0
04.04.2016 01:00	0
04.04.2016 01:05	0
04.04.2016 01:10	0
04.04.2016 01:15	0
04.04.2016 01:20	0
04.04.2016 01:25	0
04.04.2016 01:30	0
04.04.2016 01:35	0
04.04.2016 01:40	0
04.04.2016 01:45	0
04.04.2016 01:50	0
04.04.2016 01:55	0
04.04.2016 02:00	0
04.04.2016 02:05	0
04.04.2016 02:10	0
04.04.2016 02:15	0
04.04.2016 02:20	0
04.04.2016 02:25	0
04.04.2016 02:30	0
04.04.2016 02:35	0
04.04.2016 02:40	0
04.04.2016 02:45	0
04.04.2016 02:50	0
04.04.2016 02:55	0
04.04.2016 03:00	0
04.04.2016 03:05	0
04.04.2016 03:10	0
04.04.2016 03:15	0
04.04.2016 03:20	0
04.04.2016 03:25	0
04.04.2016 03:30	0
04.04.2016 03:35	0
04.04.2016 03:40	0
04.04.2016 03:45	0
04.04.2016 03:50	0
04.04.2016 03:55	0
04.04.2016 04:00	0
04.04.2016 04:05	0
04.04.2016 04:10	0
04.04.2016 04:15	0
04.04.2016 04:20	0
04.04.2016 04:25	0
04.04.2016 04:30	0
04.04.2016 04:35	0
04.04.2016 04:40	0
04.04.2016 04:45	0
04.04.2016 04:50	0
04.04.2016 04:55	0
04.04.2016 05:00	0
04.04.2016 05:05	0
04.04.2016 05:10	0
04.04.2016 05:15	0
04.04.2016 05:20	0
04.04.2016 05:25	0
04.04.2016 05:30	0
04.04.2016 05:35	0
04.04.2016 05:40	0
04.04.2016 05:45	0
04.04.2016 05:50	0
04.04.2016 05:55	0
04.04.2016 06:00	0
04.04.2016 06:05	0
04.04.2016 06:10	0
04.04.2016 06:15	0
04.04.2016 06:20	0
04.04.2016 06:25	0
04.04.2016 06:30	0
04.04.2016 06:35	0
04.04.2016 06:40	0
04.04.2016 06:45	0
04.04.2016 06:50	0
04.04.2016 06:55	0
04.04.2016 07:00	0
04.04.2016 07:05	0
04.04.2016 07:10	0
04.04.2016 07:15	0
04.04.2016 07:20	0
04.04.2016 07:25	0
04.04.2016 07:30	0
04.04.2016 07:35	0
04.04.2016 07:40	0
04.04.2016 07:45	0
04.04.2016 07:50	0
04.04.2016 07:55	0
04.04.2016 08:00	0
04.04.2016 08:05	0
04.04.2016 08:10	0
04.04.2016 08:15	0
04.04.2016 08:20	0
04.04.2016 08:25	0
04.04.2016 08:30	0
04.04.2016 08:35	0
04.04.2016 08:40	0
04.04.2016 08:45	0
04.04.2016 08:50	0
04.04.2016 08:55	0
04.04.2016 09:00	0
04.04.2016 09:05	0
04.04.2016 09:10	0
04.04.2016 09:15	0
04.04.2016 09:20	0
04.04.2016 09:25	0
04.04.2016 09:30	0
04.04.2016 09:35	0
04.04.2016 09:40	0
04.04.2016 09:45	0
04.04.2016 09:50	0
04.04.2016 09:55	0
04.04.2016 10:00	0
04.04.2016 10:05	0
04.04.2016 10:10	0
04.04.2016 10:15	0
04.04.2016 10:20	0
04.04.2016 10:25	0
04.04.2016 10:30	0
04.04.2016 10:35	0
04.04.2016 10:40	0
04.04.2016 10:45	0
04.04.2016 10:50	0
04.04.2016 10:55	0
04.04.2016 11:00	0
04.04.2016 11:05	0
04.04.2016 11:10	0
04.04.2016 11:15	0
04.04.2016 11:20	0
04.04.2016 11:25	0
04.04.2016 11:30	0
04.04.2016 11:35	0
04.04.2016 11:40	0
04.04.2016 11:45	0
04.04.2016 11:50	0
04.04.2016 11:55	0
04.04.2016 12:00	0
04.04.2016 12:05	0
04.04.2016 12:10	0
04.04.2016 12:15	0
04.04.2016 12:20	0
04.04.2016 12:25	0
04.04.2016 12:30	0
04.04.2016 12:35	0
04.04.2016 12:40	0
04.04.2016 12:45	0
04.04.2016 12:50	0
04.04.2016 12:55	0
04.04.2016 13:00	0
04.04.2016 13:05	0
04.04.2016 13:10	0
04.04.2016 13:15	0
04.04.2016 13:20	0
04.04.2016 13:25	0
04.04.2016 13:30	0
04.04.2016 13:35	0
04.04.2016 13:40	0
04.04.2016 13:45	0
04.04.2016 13:50	0
04.04.2016 13:55	0
04.04.2016 14:00	0
04.04.2016 14:05	0
04.04.2016 14:10	0
04.04.2016 14:15	0
04.04.2016 14:20	0
04.04.2016 14:25	0
04.04.2016 14:30	0
04.04.2016 14:35	0
04.04.2016 14:40	0
04.04.2016 14:45	0
04.04.2016 14:50	0
04.04.2016 14:55	0
04.04.2016 15:00	0
04.04.2016 15:05	0
04.04.2016 15:10	0
04.04.2016 15:15	0
04.04.2016 15:20	0
04.04.2016 15:25	0
04.04.2016 15:30	0
04.04.2016 15:35	0
04.04.2016 15:40	0
04.04.2016 15:45	0
04.04.2016 15:50	0
04.04.2016 15:55	0
04.04.2016 16:00	0
04.04.2016 16:05	0
04.04.2016 16:10	0
04.04.2016 16:15	0
04.04.2016 16:20	0
04.04.2016 16:25	0
04.04.2016 16:30	0
04.04.2016 16:35	0
04.04.2016 16:40	0
04.04.2016 16:45	0
04.04.2016 16:50	0
04.04.2016 16:55	0
04.04.2016 17:00	0
04.04.2016 17:05	0
04.04.2016 17:10	0
04.04.2016 17:15	0
04.04.2016 17:20	0
04.04.2016 17:25	0
04.04.2016 17:30	0
04.04.2016 17:35	0
04.04.2016 17:40	0
04.04.2016 17:45	0
04.04.2016 17:50	0
04.04.2016 17:55	0
04.04.2016 18:00	0
04.04.2016 18:05	0
04.04.2016 18:10	0
04.04.2016 18:15	0
04.04.2016 18:20	0
04.04.2016 18:25	0
04.04.2016 18:30	0
04.04.2016 18:35	0
04.04.2016 18:40	0
04.04.2016 18:45	0
04.04.2016 18:50	0
04.04.2016 18:55	0
04.04.2016 19:00	0
04.04.2016 19:05	0
04.04.2016 19:10	0
04.04.2016 19:15	0
04.04.2016 19:20	0
04.04.2016 19:25	0
04.04.2016 19:30	0
04.04.2016 19:35	0
04.04.2016 19:40	0
04.04.2016 19:45	0
04.04.2016 19:50	0
04.04.2016 19:55	0
04.04.2016 20:00	0
04.04.2016 20:05	0
04.04.2016 20:10	0
04.04.2016 20:15	0
04.04.2016 20:20	0
04.04.2016 20:25	0
04.04.2016 20:30	0
04.04.2016 20:35	0
04.04.2016 20:40	0
04.04.2016 20:45	0
04.04.2016 20:50	0
04.04.2016 20:55	0
04.04.2016 21:00	0
04.04.2016 21:05	0
04.04.2016 21:10	0
04.04.2016 21:15	0
04.04.2016 21:20	0
04.04.2016 21:25	0
04.04.2016 21:30	0
04.04.2016 21:35	0
04.04.2016 21:40	0
04.04.2016 21:45	0
04.04.2016 21:50	0
04.04.2016 21:55	0
04.04.2016 22:00	0
04.04.2016 22:05	0
04.04.2016 22:10	0
04.04.2016 22:15	0
04.04.2016 22:20	0
04.04.2016 22:25	0
04.04.2016 22:30	0
04.04.2016 22:35	0
04.04.2016 22:40	0
04.04.2016 22:45	0
04.04.2016 22:50	0
04.04.2016 22:55	0
04.04.2016 23:00	0
04.04.2016 23:05	0
04.04.2016 23:10	0
04.04.2016 23:15	0
04.04.2016 23:20	0
04.04.2016 23:25	0
04.04.2016 23:30	0
04.04.2016 23:35	0
04.04.2016 23:40	0
04.04.2016 23:45	0
04.04.2016 23:50	0
04.04.2016 23:55	0
05.04.2016 00:00	0
05.04.2016 00:05	0
05.04.2016 00:10	0
05.04.2016 00:15	0
05.04.2016 00:20	0
05.04.2016 00:25	0
05.04.2016 00:30	0
05.04.2016 00:35	0
05.04.2016 00:40	0
05.04.2016 00:45	0
05.04.2016 00:50	0
05.04.2016 00:55	0
05.04.2016 01:00	0
05.04.2016 01:05	0
05.04.2016 01:10	0
05.04.2016 01:15	0
05.04.2016 01:20	0
05.04.2016 01:25	0
05.04.2016 01:30	0
05.04.2016 01:35	0
05.04.2016 01:40	0
05.04.2016 01:45	0
05.04.2016 01:50	0
05.04.2016 01:55	0
05.04.2016 02:00	0
05.04.2016 02:05	0
05.04.2016 02:10	0
05.04.2016 02:15	0
05.04.2016 02:20	0
05.04.2016 02:25	0
05.04.2016 02:30	0
05.04.2016 02:35	0
05.04.2016 02:40	0
05.04.2016 02:45	0
05.04.2016 02:50	0
05.04.2016 02:55	0
05.04.2016 03:00	0
05.04.2016 03:05	0
05.04.2016 03:10	0
05.04.2016 03:15	0
05.04.2016 03:20	0
05.04.2016 03:25	0
05.04.2016 03:30	0
05.04.2016 03:35	0
05.04.2016 03:40	0
05.04.2016 03:45	0
05.04.2016 03:50	0
05.04.2016 03:55	0
05.04.2016 04:00	0
05.04.2016 04:05	0
05.04.2016 04:10	0
05.04.2016 04:15	0
05.04.2016 04:20	0
05.04.2016 04:25	0
05.04.2016 04:30	0
05.04.2016 04:35	0
05.04.2016 04:40	0
05.04.2016 04:45	0
05.04.2016 04:50	0
05.04.2016 04:55	0
05.04.2016 05:00	0
05.04.2016 05:05	0
05.04.2016 05:10	0
05.04.2016 05:15	0
05.04.2016 05:20	0
05.04.2016 05:25	0
05.04.2016 05:30	0
05.04.2016 05:35	0
05.04.2016 05:40	0
05.04.2016 05:45	0
05.04.2016 05:50	0
05.04.2016 05:55	0
05.04.2016 06:00	0
05.04.2016 06:05	0
05.04.2016 06:10	0
05.04.2016 06:15	0
05.04.2016 06:20	0
05.04.2016 06:25	0
05.04.2016 06:30	0
05.04.2016 06:35	0
05.04.2016 06:40	0
05.04.2016 06:45	0
05.04.2016 06:50	0
05.04.2016 06:55	0
05.04.2016 07:00	0
05.04.2016 07:05	0
05.04.2016 07:10	0
05.04.2016 07:15	0
05.04.2016 07:20	0
05.04.2016 07:25	0
05.04.2016 07:30	0
05.04.2016 07:35	0
05.04.2016 07:40	0
05.04.2016 07:45	0
05.04.2016 07:50	0
05.04.2016 07:55	0
05.04.2016 08:00	0
05.04.2016 08:05	0
05.04.2016 08:10	0
05.04.2016 08:15	0
05.04.2016 08:20	0
05.04.2016 08:25	0
05.04.2016 08:30	0
05.04.2016 08:35	0
05.04.2016 08:40	0
05.04.2016 08:45	0
05.04.2016 08:50	0
05.04.2016 08:55	0
05.04.2016 09:00	0
05.04.2016 09:05	0
05.04.2016 09:10	0
05.04.2016 09:15	0
05.04.2016 09:20	0
05.04.2016 09:25	0
05.04.2016 09:30	0
05.04.2016 09:35	0
05.04.2016 09:40	0
05.04.2016 09:45	0
05.04.2016 09:50	0
05.04.2016 09:55	0
05.04.2016 10:00	0
05.04.2016 10:05	0
05.04.2016 10:10	0
05.04.2016 10:15	0
05.04.2016 10:20	0
05.04.2016 10:25	0
05.04.2016 10:30	0
05.04.2016 10:35	0
05.04.2016 10:40	0
05.04.2016 10:45	0
05.04.2016 10:50	0
05.04.2016 10:55	0
05.04.2016 11:00	0
05.04.2016 11:05	0
05.04.2016 11:10	0
05.04.2016 11:15	0
05.04.2016 11:20	0
05.04.2016 11:25	0
05.04.2016 11:30	0
05.04.2016 11:35	0
05.04.2016 11:40	0
05.04.2016 11:45	0
05.04.2016 11:50	0
05.04.2016 11:55	0
05.04.2016 12:00	0
05.04.2016 12:05	0
05.04.2016 12:10	0
05.04.2016 12:15	0
05.04.2016 12:20	0
05.04.2016 12:25	0
05.04.2016 12:30	0
05.04.2016 12:35	0
05.04.2016 12:40	0
05.04.2016 12:45	0
05.04.2016 12:50	0
05.04.2016 12:55	0
05.04.2016 13:00	0
05.04.2016 13:05	0
05.04.2016 13:10	0
05.04.2016 13:15	0
05.04.2016 13:20	0
05.04.2016 13:25	0
05.04.2016 13:30	0
05.04.2016 13:35	0
05.04.2016 13:40	0
05.04.2016 13:45	0
05.04.2016 13:50	0
05.04.2016 13:55	0
05.04.2016 14:00	0
05.04.2016 14:05	0
05.04.2016 14:10	0
05.04.2016 14:15	0
05.04.2016 14:20	0
05.04.2016 14:25	0
05.04.2016 14:30	0
05.04.2016 14:35	0
05.04.2016 14:40	0
05.04.2016 14:45	0
05.04.2016 14:50	0
05.04.2016 14:55	0
05.04.2016 15:00	0
05.04.2016 15:05	0
05.04.2016 15:10	0
05.04.2016 15:15	0
05.04.2016 15:20	0
05.04.2016 15:25	0
05.04.2016 15:30	0
05.04.2016 15:35	0
05.04.2016 15:40	0
05.04.2016 15:45	0
05.04.2016 15:50	0
05.04.2016 15:55	0
05.04.2016 16:00	0
05.04.2016 16:05	0
05.04.2016 16:10	0
05.04.2016 16:15	0
05.04.2016 16:20	0
05.04.2016 16:25	0
05.04.2016 16:30	0
05.04.2016 16:35	0
05.04.2016 16:40	0
05.04.2016 16:45	0
05.04.2016 16:50	0
05.04.2016 16:55	0
05.04.2016 17:00	0
05.04.2016 17:05	0
05.04.2016 17:10	0
05.04.2016 17:15	0
05.04.2016 17:20	0
05.04.2016 17:25	0
05.04.2016 17:30	0
05.04.2016 17:35	0
05.04.2016 17:40	0
05.04.2016 17:45	0
05.04.2016 17:50	0
05.04.2016 17:55	0
05.04.2016 18:00	0
05.04.2016 18:05	0
05.04.2016 18:10	0
05.04.2016 18:15	0
05.04.2016 18:20	0
05.04.2016 18:25	0
05.04.2016 18:30	0
05.04.2016 18:35	0
05.04.2016 18:40	0
05.04.2016 18:45	0
05.04.2016 18:50	0
05.04.2016 18:55	0
05.04.2016 19:00	0
05.04.2016 19:05	0
05.04.2016 19:10	0
05.04.2016 19:15	0
05.04.2016 19:20	0
05.04.2016 19:25	0
05.04.2016 19:30	0
05.04.2016 19:35	0
05.04.2016 19:40	0
05.04.2016 19:45	0
05.04.2016 19:50	0
05.04.2016 19:55	0
05.04.2016 20:00	0
05.04.2016 20:05	0
05.04.2016 20:10	0
05.04.2016 20:15	0
05.04.2016 20:20	0
05.04.2016 20:25	0
05.04.2016 20:30	0
05.04.2016 20:35	0
05.04.2016 20:40	0
05.04.2016 20:45	0
05.04.2016 20:50	0
05.04.2016 20:55	0
05.04.2016 21:00	0
05.04.2016 21:05	0
05.04.2016 21:10	0
05.04.2016 21:15	0
05.04.2016 21:20	0
05.04.2016 21:25	0
05.04.2016 21:30	0
05.04.2016 21:35	0
05.04.2016 21:40	0
05.04.2016 21:45	0
05.04.2016 21:50	0
05.04.2016 21:55	0
05.04.2016 22:00	0
05.04.2016 22:05	0
05.04.2016 22:10	0
05.04.2016 22:15	0
05.04.2016 22:20	0
05.04.2016 22:25	0
05.04.2016 22:30	0
05.04.2016 22:35	0
05.04.2016 22:40	0
05.04.2016 22:45	0
05.04.2016 22:50	0
05.04.2016 22:55	0
05.04.2016 23:00	0
05.04.2016 23:05	0
05.04.2016 23:10	0
05.04.2016 23:15	0
05.04.2016 23:20	0
05.04.2016 23:25	0
05.04.2016 23:30	0
05.04.2016 23:35	0
05.04.2016 23:40	0
05.04.2016 23:45	0
05.04.2016 23:50	0
05.04.2016 23:55	0
06.04.2016 00:00	0
06.04.2016 00:05	0
06.04.2016 00:10	0
06.04.2016 00:15	0
06.04.2016 00:20	0
06.04.2016 00:25	0
06.04.2016 00:30	0
06.04.2016 00:35	0
06.04.2016 00:40	0
06.04.2016 00:45	0
06.04.2016 00:50	0
06.04.2016 00:55	0
06.04.2016 01:00	0
06.04.2016 01:05	0
06.04.2016 01:10	0
06.04.2016 01:15	0
06.04.2016 01:20	0
06.04.2016 01:25	0
06.04.2016 01:30	0
06.04.2016 01:35	0
06.04.2016 01:40	0
06.04.2016 01:45	0
06.04.2016 01:50	0
06.04.2016 01:55	0
06.04.2016 02:00	0
06.04.2016 02:05	0
06.04.2016 02:10	0
06.04.2016 02:15	0
06.04.2016 02:20	0
06.04.2016 02:25	0
06.04.2016 02:30	0
06.04.2016 02:35	0
06.04.2016 02:40	0
06.04.2016 02:45	0
06.04.2016 02:50	0
06.04.2016 02:55	0
06.04.2016 03:00	0
06.04.2016 03:05	0
06.04.2016 03:10	0
06.04.2016 03:15	0
06.04.2016 03:20	0
06.04.2016 03:25	0
06.04.2016 03:30	0
06.04.2016 03:35	0
06.04.2016 03:40	0
06.04.2016 03:45	0
06.04.2016 03:50	0
06.04.2016 03:55	0
06.04.2016 04:00	0
06.04.2016 04:05	0
06.04.2016 04:10	0
06.04.2016 04:15	0
06.04.2016 04:20	0
06.04.2016 04:25	0
06.04.2016 04:30	0
06.04.2016 04:35	0
06.04.2016 04:40	0
06.04.2016 04:45	0
06.04.2016 04:50	0
06.04.2016 04:55	0
06.04.2016 05:00	0
06.04.2016 05:05	0
06.04.2016 05:10	0
06.04.2016 05:15	0
06.04.2016 05:20	0
06.04.2016 05:25	0
06.04.2016 05:30	0
06.04.2016 05:35	0
06.04.2016 05:40	0
06.04.2016 05:45	0
06.04.2016 05:50	0
06.04.2016 05:55	0
06.04.2016 06:00	0
06.04.2016 06:05	0
06.04.2016 06:10	0
06.04.2016 06:15	0
06.04.2016 06:20	0
06.04.2016 06:25	0
06.04.2016 06:30	0
06.04.2016 06:35	0
06.04.2016 06:40	0
06.04.2016 06:45	0
06.04.2016 06:50	0
06.04.2016 06:55	0
06.04.2016 07:00	0
06.04.2016 07:05	0
06.04.2016 07:10	0
06.04.2016 07:15	0
06.04.2016 07:20	0
06.04.2016 07:25	0
06.04.2016 07:30	0
06.04.2016 07:35	0
06.04.2016 07:40	0
06.04.2016 07:45	0
06.04.2016 07:50	0
06.04.2016 07:55	0
06.04.2016 08:00	0
06.04.2016 08:05	0
06.04.2016 08:10	0
06.04.2016 08:15	0
06.04.2016 08:20	0
06.04.2016 08:25	0
06.04.2016 08:30	0
06.04.2016 08:35	0
06.04.2016 08:40	0
06.04.2016 08:45	0
06.04.2016 08:50	0
06.04.2016 08:55	0
06.04.2016 09:00	0
06.04.2016 09:05	0
06.04.2016 09:10	0
06.04.2016 09:15	0
06.04.2016 09:20	0
06.04.2016 09:25	0
06.04.2016 09:30	0
06.04.2016 09:35	0
06.04.2016 09:40	0
06.04.2016 09:45	0
06.04.2016 09:50	0
06.04.2016 09:55	0
06.04.2016 10:00	0
06.04.2016 10:05	0
06.04.2016 10:10	0
06.04.2016 10:15	0
06.04.2016 10:20	0
06.04.2016 10:25	0
06.04.2016 10:30	0
06.04.2016 10:35	0
06.04.2016 10:40	0
06.04.2016 10:45	0
06.04.2016 10:50	0
06.04.2016 10:55	0
06.04.2016 11:00	0
06.04.2016 11:05	0
06.04.2016 11:10	0
06.04.2016 11:15	0
06.04.2016 11:20	0
06.04.2016 11:25	0
06.04.2016 11:30	0
06.04.2016 11:35	0
06.04.2016 11:40	0
06.04.2016 11:45	0
06.04.2016 11:50	0
06.04.2016 11:55	0
06.04.2016 12:00	0
06.04.2016 12:05	0
06.04.2016 12:10	0
06.04.2016 12:15	0
06.04.2016 12:20	0
06.04.2016 12:25	0
06.04.2016 12:30	0
06.04.2016 12:35	0
06.04.2016 12:40	0
06.04.2016 12:45	0
06.04.2016 12:50	0
06.04.2016 12:55	0
06.04.2016 13:00	0
06.04.2016 13:05	0
06.04.2016 13:10	0
06.04.2016 13:15	0
06.04.2016 13:20	0
06.04.2016 13:25	0
06.04.2016 13:30	0
06.04.2016 13:35	0
06.04.2016 13:40	0
06.04.2016 13:45	0
06.04.2016 13:50	0
06.04.2016 13:55	0
06.04.2016 14:00	0
06.04.2016 14:05	0
06.04.2016 14:10	0
06.04.2016 14:15	0
06.04.2016 14:20	0
06.04.2016 14:25	0
06.04.2016 14:30	0
06.04.2016 14:35	0
06.04.2016 14:40	0
06.04.2016 14:45	0
06.04.2016 14:50	0
06.04.2016 14:55	0
06.04.2016 15:00	0
06.04.2016 15:05	0
06.04.2016 15:10	0
06.04.2016 15:15	0
06.04.2016 15:20	0
06.04.2016 15:25	0
06.04.2016 15:30	0
06.04.2016 15:35	0
06.04.2016 15:40	0
06.04.2016 15:45	0
06.04.2016 15:50	0
06.04.2016 15:55	0
06.04.2016 16:00	0
06.04.2016 16:05	0
06.04.2016 16:10	0
06.04.2016 16:15	0
06.04.2016 16:20	0
06.04.2016 16:25	0
06.04.2016 16:30	0
06.04.2016 16:35	0
06.04.2016 16:40	0
06.04.2016 16:45	0
06.04.2016 16:50	0
06.04.2016 16:55	0
06.04.2016 17:00	0
06.04.2016 17:05	0
06.04.2016 17:10	0
06.04.2016 17:15	0
06.04.2016 17:20	0
06.04.2016 17:25	0
06.04.2016 17:30	0
06.04.2016 17:35	0
06.04.2016 17:40	0
06.04.2016 17:45	0
06.04.2016 17:50	0
06.04.2016 17:55	0
06.04.2016 18:00	0
06.04.2016 18:05	0
06.04.2016 18:10	0
06.04.2016 18:15	0
06.04.2016 18:20	0
06.04.2016 18:25	0
06.04.2016 18:30	0
06.04.2016 18:35	0
06.04.2016 18:40	0
06.04.2016 18:45	0
06.04.2016 18:50	0
06.04.2016 18:55	0
06.04.2016 19:00	0
06.04.2016 19:05	0
06.04.2016 19:10	0
06.04.2016 19:15	0
06.04.2016 19:20	0
06.04.2016 19:25	0
06.04.2016 19:30	0
06.04.2016 19:35	0
06.04.2016 19:40	0
06.04.2016 19:45	0
06.04.2016 19:50	0
06.04.2016 19:55	0
06.04.2016 20:00	0
06.04.2016 20:05	0
06.04.2016 20:10	0
06.04.2016 20:15	0
06.04.2016 20:20	0
06.04.2016 20:25	0
06.04.2016 20:30	0
06.04.2016 20:35	0
06.04.2016 20:40	0
06.04.2016 20:45	0
06.04.2016 20:50	0
06.04.2016 20:55	0
06.04.2016 21:00	0
06.04.2016 21:05	0
06.04.2016 21:10	0
06.04.2016 21:15	0
06.04.2016 21:20	0
06.04.2016 21:25	0
06.04.2016 21:30	0
06.04.2016 21:35	0
06.04.2016 21:40	0
06.04.2016 21:45	0
06.04.2016 21:50	0
06.04.2016 21:55	0
06.04.2016 22:00	0
06.04.2016 22:05	0
06.04.2016 22:10	0
06.04.2016 22:15	0
06.04.2016 22:20	0
06.04.2016 22:25	0
06.04.2016 22:30	0
06.04.2016 22:35	0
06.04.2016 22:40	0
06.04.2016 22:45	0
06.04.2016 22:50	0
06.04.2016 22:55	0
06.04.2016 23:00	0
06.04.2016 23:05	0
06.04.2016 23:10	0
06.04.2016 23:15	0
06.04.2016 23:20	0
06.04.2016 23:25	0
06.04.2016 23:30	0
06.04.2016 23:35	0
06.04.2016 23:40	0
06.04.2016 23:45	0
06.04.2016 23:50	0
06.04.2016 23:55	0
07.04.2016 00:00	0
07.04.2016 00:05	0
07.04.2016 00:10	0
07.04.2016 00:15	0
07.04.2016 00:20	0
07.04.2016 00:25	0
07.04.2016 00:30	0
07.04.2016 00:35	0
07.04.2016 00:40	0
07.04.2016 00:45	0
07.04.2016 00:50	0
07.04.2016 00:55	0
07.04.2016 01:00	0
07.04.2016 01:05	0
07.04.2016 01:10	0
07.04.2016 01:15	0
07.04.2016 01:20	0
07.04.2016 01:25	0
07.04.2016 01:30	0
07.04.2016 01:35	0
07.04.2016 01:40	0
07.04.2016 01:45	0
07.04.2016 01:50	0
07.04.2016 01:55	0
07.04.2016 02:00	0
07.04.2016 02:05	0
07.04.2016 02:10	0
07.04.2016 02:15	0
07.04.2016 02:20	0
07.04.2016 02:25	0
07.04.2016 02:30	0
07.04.2016 02:35	0
07.04.2016 02:40	0
07.04.2016 02:45	0
07.04.2016 02:50	0
07.04.2016 02:55	0
07.04.2016 03:00	0
07.04.2016 03:05	0
07.04.2016 03:10	0
07.04.2016 03:15	0
07.04.2016 03:20	0
07.04.2016 03:25	0
07.04.2016 03:30	0
07.04.2016 03:35	0
07.04.2016 03:40	0
07.04.2016 03:45	0
07.04.2016 03:50	0
07.04.2016 03:55	0
07.04.2016 04:00	0
07.04.2016 04:05	0
07.04.2016 04:10	0
07.04.2016 04:15	0
07.04.2016 04:20	0
07.04.2016 04:25	0
07.04.2016 04:30	0
07.04.2016 04:35	0
07.04.2016 04:40	0
07.04.2016 04:45	0
07.04.2016 04:50	0
07.04.2016 04:55	0
07.04.2016 05:00	0
07.04.2016 05:05	0
07.04.2016 05:10	0
07.04.2016 05:15	0
07.04.2016 05:20	0
07.04.2016 05:25	0
07.04.2016 05:30	0
07.04.2016 05:35	0
07.04.2016 05:40	0
07.04.2016 05:45	0
07.04.2016 05:50	0
07.04.2016 05:55	0
07.04.2016 06:00	0
07.04.2016 06:05	0
07.04.2016 06:10	0
07.04.2016 06:15	0
07.04.2016 06:20	0
07.04.2016 06:25	0
07.04.2016 06:30	0
07.04.2016 06:35	0
07.04.2016 06:40	0
07.04.2016 06:45	0
07.04.2016 06:50	0
07.04.2016 06:55	0
07.04.2016 07:00	0
07.04.2016 07:05	0
07.04.2016 07:10	0
07.04.2016 07:15	0
07.04.2016 07:20	0
07.04.2016 07:25	0
07.04.2016 07:30	0
07.04.2016 07:35	0
07.04.2016 07:40	0
07.04.2016 07:45	0
07.04.2016 07:50	0
07.04.2016 07:55	0
07.04.2016 08:00	0
07.04.2016 08:05	0
07.04.2016 08:10	0
07.04.2016 08:15	0
07.04.2016 08:20	0
07.04.2016 08:25	0
07.04.2016 08:30	0
07.04.2016 08:35	0
07.04.2016 08:40	0
07.04.2016 08:45	0
07.04.2016 08:50	0
07.04.2016 08:55	0
07.04.2016 09:00	0
07.04.2016 09:05	0
07.04.2016 09:10	0
07.04.2016 09:15	0
07.04.2016 09:20	0
07.04.2016 09:25	0
07.04.2016 09:30	0
07.04.2016 09:35	0
07.04.2016 09:40	0
07.04.2016 09:45	0
07.04.2016 09:50	0
07.04.2016 09:55	0
07.04.2016 10:00	0
07.04.2016 10:05	0
07.04.2016 10:10	0
07.04.2016 10:15	0
07.04.2016 10:20	0
07.04.2016 10:25	0
07.04.2016 10:30	0
07.04.2016 10:35	0
07.04.2016 10:40	0
07.04.2016 10:45	0
07.04.2016 10:50	0
07.04.2016 10:55	0
07.04.2016 11:00	0
07.04.2016 11:05	0
07.04.2016 11:10	0
07.04.2016 11:15	0
07.04.2016 11:20	0
07.04.2016 11:25	0
07.04.2016 11:30	0
07.04.2016 11:35	0
07.04.2016 11:40	0
07.04.2016 11:45	0
07.04.2016 11:50	0
07.04.2016 11:55	0
07.04.2016 12:00	0
07.04.2016 12:05	0
07.04.2016 12:10	0
07.04.2016 12:15	0
07.04.2016 12:20	0
07.04.2016 12:25	0
07.04.2016 12:30	0
07.04.2016 12:35	0
07.04.2016 12:40	0
07.04.2016 12:45	0
07.04.2016 12:50	0
07.04.2016 12:55	0
07.04.2016 13:00	0
07.04.2016 13:05	0
07.04.2016 13:10	0
07.04.2016 13:15	0
07.04.2016 13:20	0
07.04.2016 13:25	0
07.04.2016 13:30	0
07.04.2016 13:35	0
07.04.2016 13:40	0
07.04.2016 13:45	0
07.04.2016 13:50	0
07.04.2016 13:55	0
07.04.2016 14:00	0
07.04.2016 14:05	0
07.04.2016 14:10	0
07.04.2016 14:15	0
07.04.2016 14:20	0
07.04.2016 14:25	0
07.04.2016 14:30	0
07.04.2016 14:35	0
07.04.2016 14:40	0
07.04.2016 14:45	0
07.04.2016 14:50	0
07.04.2016 14:55	0
07.04.2016 15:00	0
07.04.2016 15:05	0
07.04.2016 15:10	0
07.04.2016 15:15	0
07.04.2016 15:20	0
07.04.2016 15:25	0
07.04.2016 15:30	0
07.04.2016 15:35	0
07.04.2016 15:40	0
07.04.2016 15:45	0
07.04.2016 15:50	0
07.04.2016 15:55	0
07.04.2016 16:00	0
07.04.2016 16:05	0
07.04.2016 16:10	0
07.04.2016 16:15	0
07.04.2016 16:20	0
07.04.2016 16:25	0
07.04.2016 16:30	0
07.04.2016 16:35	0
07.04.2016 16:40	0
07.04.2016 16:45	0
07.04.2016 16:50	0
07.04.2016 16:55	0
07.04.2016 17:00	0
07.04.2016 17:05	0
07.04.2016 17:10	0
07.04.2016 17:15	0
07.04.2016 17:20	0
07.04.2016 17:25	0
07.04.2016 17:30	0
07.04.2016 17:35	0
07.04.2016 17:40	0
07.04.2016 17:45	0
07.04.2016 17:50	0
07.04.2016 17:55	0
07.04.2016 18:00	0
07.04.2016 18:05	0
07.04.2016 18:10	0
07.04.2016 18:15	0
07.04.2016 18:20	0
07.04.2016 18:25	0
07.04.2016 18:30	0
07.04.2016 18:35	0
07.04.2016 18:40	0
07.04.2016 18:45	0
07.04.2016 18:50	0
07.04.2016 18:55	0
07.04.2016 19:00	0
07.04.2016 19:05	0
07.04.2016 19:10	0
07.04.2016 19:15	0
07.04.2016 19:20	0
07.04.2016 19:25	0
07.04.2016 19:30	0
07.04.2016 19:35	0
07.04.2016 19:40	0
07.04.2016 19:45	0
07.04.2016 19:50	0
07.04.2016 19:55	0
07.04.2016 20:00	0
07.04.2016 20:05	0
07.04.2016 20:10	0
07.04.2016 20:15	0
07.04.2016 20:20	0
07.04.2016 20:25	0
07.04.2016 20:30	0
07.04.2016 20:35	0
07.04.2016 20:40	0
07.04.2016 20:45	0
07.04.2016 20:50	0
07.04.2016 20:55	0
07.04.2016 21:00	0
07.04.2016 21:05	0
07.04.2016 21:10	0
07.04.2016 21:15	0
07.04.2016 21:20	0
07.04.2016 21:25	0
07.04.2016 21:30	0
07.04.2016 21:35	0
07.04.2016 21:40	0
07.04.2016 21:45	0
07.04.2016 21:50	0
07.04.2016 21:55	0
07.04.2016 22:00	0
07.04.2016 22:05	0
07.04.2016 22:10	0
07.04.2016 22:15	0
07.04.2016 22:20	0
07.04.2016 22:25	0
07.04.2016 22:30	0
[truncated: 147,186 more rows]
