# Supplementary material for: Pesticide peak concentration reduction in a small vegetated treatment system controlled by chemograph shape
Source: Copernicus journal article supplement (doi:10.5194/hess-25-497-2021), 2021-02-02
Supplement: Supplementary file 1 [file hess-25-497-2021-supplement.zip › Data_FlowEvents.csv]

Date	Time	ID	Sampling Point	bos [ng/L]	pen [ng/L]	met [ng/L]	flu [ng/L]	met-ESA [ng/L]	met-OA [ng/L]	bos_sd [ng/L]	pen_sd [ng/L]	met_sd [ng/L]	flu_sd [ng/L]	met-ESA_sd [ng/L]	met-OA_sd[ng/L]	Remarks
14.06.2016	11:05	E1	inlet	56	4.83	1.23	<LOQ	43.75	89.14	0.53	0.16	0.02	<LOQ	8.1	6.97
14.06.2016	11:35	E1	inlet	154.68	48.06	2.09	<LOQ	19.5	45.82	17.22	4.3	0.33	<LOQ	10.4	7.44
14.06.2016	12:05	E1	inlet	146.53	20.71	1.41	<LOQ	24.25	60.2	4.16	0.57	0.13	<LOQ	9.7	20.28
14.06.2016	12:05	E1	outlet	146.49	13.43	<LOQ	<LOQ	15.87	45.26	7.73	0.06	<LOQ	<LOQ	<LOQ	4.92
14.06.2016	12:35	E1	outlet	144.59	22.73	1.76	<LOQ	23.49	44.1	12.45	2.1	<LOQ	<LOQ	<LOQ	3.91
14.06.2016	13:05	E1	inlet	121.39	19.32	2.54	<LOQ	26.87	62.87	7.24	2.63	0.17	<LOQ	7.15	14.32
14.06.2016	13:05	E1	outlet	125.99	17.33	1.33	<LOQ	12.91	39.58	11.62	1.24	0.09	<LOQ	1.54	1.97
14.06.2016	14:05	E1	outlet	112.52	13.72	1.84	<LOQ	<LOQ	41.82	0.62	0.09	0.02	<LOQ	<LOQ	1.91
14.06.2016	17:05	E1	inlet	318.41	32.35	7.47	<LOQ	28.12	51.11	41.58	3.62	0.68	<LOQ	2.68	12.68
14.06.2016	18:05	E1	outlet	249.97	24.51	3.62	<LOQ	18.1	44.75	3.03	0.86	0.08	<LOQ	1.18	17.37
14.06.2016	23:05	E1	inlet	264.97	8.12	6.96	<LOQ	45.42	124.97	36.24	0.8	0.93	<LOQ	5.51	28.22
15.06.2016	00:05	E1	outlet	244.78	9.17	4.82	<LOQ	41.54	94.02	5.38	0.01	0.06	<LOQ	0.24	13.17
25.06.2016	00:51	E2	inlet	69.07	12.04	2.53	<LOQ	<LOQ	<LOQ	3.41	0.56	0.09	<LOQ	<LOQ	<LOQ
25.06.2016	00:52	E2	outlet	87.57	9.95	1.26	<LOQ	270.11	307.63	5.08	0.33	0.13	<LOQ	258.46	257.37
25.06.2016	01:21	E2	inlet	5967.02	593.58	4235.54	2.58	<LOQ	53.46	116.57	88.05	35.2	0.18	<LOQ	16.93
25.06.2016	01:21	E2	outlet	4523.47	165.65	142.49	<LOQ	<LOQ	31.02	271.36	8.24	139.54	<LOQ	<LOQ	2.9
25.06.2016	01:51	E2	inlet	8423.26	640.71	9676.51	1.84	100.69	212.11	144.96	29.86	205.69	<LOQ	<LOQ	40.54
25.06.2016	01:51	E2	outlet	4419.15	269.25	1845.93	2.6	<LOQ	41.5	264.31	40.2	53.81	0.5	<LOQ	9.89
25.06.2016	02:51	E2	inlet	4243.36	278.75	5642.1	<LOQ	15.21	102.27	31.51	5.99	77.62	<LOQ	0.15	17.08
25.06.2016	02:51	E2	outlet	6215.62	323.87	6605.94	<LOQ	120.31	160.36	167.46	9.51	91.89	<LOQ	<LOQ	90.21
25.06.2016	06:51	E2	outlet	3681.89	134.42	2672.9	<LOQ	<LOQ	66.43	389.1	7.04	290.7	<LOQ	<LOQ	28.48
25.06.2016	07:01	E2	inlet	3514.39	122.7	1191.35	<LOQ	<LOQ	438.82	13	5.18	19.6	<LOQ	<LOQ	413.56
25.06.2016	12:51	E2	inlet	884.11	27.23	655.42	<LOQ	42.23	162.9	76.83	1.14	55.84	<LOQ	6.12	46.8
25.06.2016	12:51	E2	outlet	1361.55	50.2	408.42	<LOQ	13.63	91.6	58.52	6.46	4.31	<LOQ	1.31	10.47
13.07.2016	13:52	E3	inlet	583.32	28.82	21.93	1.21	21.78	120.55	12.26	1.62	0.45	0.02	8.67	37.26
13.07.2016	14:22	E3	inlet	3270.78	209.78	48.22	<LOQ	41.03	160.74	26.89	8.24	1.44	<LOQ	<LOQ	61.4
13.07.2016	14:52	E3	inlet	3111.04	218.76	242	226.75	24.22	250.58	136.7	3.46	5.81	29.21	10.68	77.17
13.07.2016	14:52	E3	outlet	2074.15	136.43	62.44	<LOQ	36.39	195.79	73.14	0.04	0.04	<LOQ	14.14	42.02
13.07.2016	15:22	E3	outlet	2648.78	159.75	123.79	53.22	80.02	262.67	222.23	6.64	0.08	3.72	46.08	36.36
13.07.2016	15:52	E3	inlet	4032.38	278.19	106.04	1650.43	<LOQ	<LOQ	539.98	9.78	7.61	522.97	<LOQ	<LOQ
13.07.2016	15:52	E3	outlet	2363.86	166.76	123.9	121.39	45.69	225.69	11.34	0.13	1.07	3.82	21.84	35.63
13.07.2016	16:52	E3	outlet	2518.61	180.43	103.94	795.94	47.12	284.14	44.28	5.27	1.38	4.72	<LOQ	<LOQ
13.07.2016	19:52	E3	inlet	2461.45	126.78	34.86	1183.06	49.64	197.92	182.57	8	0.28	159.72	2.08	3.34
13.07.2016	20:52	E3	outlet	1621.41	88.73	49.25	593.56	19.75	147.45	463.26	42.3	39.4	412.55	6.05	0.22
14.07.2016	01:52	E3	inlet	2041.97	88.01	52.05	831.78	34.17	162.07	854.57	37.05	41.65	655.73	5.51	29.01
14.07.2016	02:52	E3	outlet	1310.43	64.38	28.73	417.27	16.05	103.88	47.38	0.31	0.11	58.86	6.37	14.14
18.10.2016	09:50	E4	inlet	49.88	7.78	2.23	3.88	2.49	1.58	0.31	0.79	0.77	1.69	0.6	0.77
18.10.2016	10:20	E4	inlet	279.62	29.16	7.66	4.47	10.78	11.48	48.51	3.21	0.32	0.43	9.54	10.47
18.10.2016	10:50	E4	inlet	312.27	60.28	18.93	36.99	<LOQ	5.09	43.17	8.84	2.66	4.17	<LOQ	4.46
18.10.2016	10:50	E4	outlet	169.85	22.93	3.29	1.96	4.06	5.08	30.17	2.99	0.01	0.17	2.69	<LOQ
18.10.2016	11:20	E4	outlet	161.91	22.43	3.57	6.09	4.24	2.51	37.57	3.3	0.26	2.89	2.69	1.73
18.10.2016	11:50	E4	inlet	170.42	32.6	6.94	11.13	5.05	5.06	7.18	4.37	1.21	0.89	2.08	3.54
18.10.2016	11:50	E4	outlet	186.43	28.99	4.78	6.8	5.81	1.73	43.42	2.37	0.15	0.93	4.88	7.7
18.10.2016	12:50	E4	outlet	202.04	25.95	4.83	11.4	<LOQ	<LOQ	19.5	0.28	0.32	3.16	<LOQ	<LOQ
18.10.2016	15:50	E4	inlet	140.29	13.45	2.3	3.01	<LOQ	<LOQ	1.18	3.82	0.04	0.14	<LOQ	<LOQ
18.10.2016	16:50	E4	outlet	140.47	19.55	10.86	5.06	4.23	3.65	4.48	0.92	7.09	0.09	2.4	2.04
18.10.2016	21:50	E4	inlet	122.88	10.28	1.06	0.99	1.74	0.44	4.76	0.86	0.12	<LOQ	0.1	0.08
18.10.2016	22:50	E4	outlet	135.46	14.48	2.32	3.31	1.04	1.05	14.87	1.04	0.11	0.13	0.52	<LOQ
17.04.2017	16:29	E5	inlet	10.5	2.11	1.68	0.18	<LOQ	<LOQ	1.38	0.2	0.04	<LOQ	<LOQ	<LOQ
17.04.2017	16:58	E5	inlet	218.57	19.79	1.36	0.49	<LOQ	<LOQ	1.7	0.92	0.01	0.01	<LOQ	<LOQ
17.04.2017	17:29	E5	outlet	282.83	11.19	1.36	0.42	<LOQ	<LOQ	19.63	0.01	0.02	0.05	<LOQ	<LOQ
17.04.2017	17:58	E5	inlet	248.43	17.48	13.48	0.61	<LOQ	0.94	41.11	1.36	0.76	0.01	<LOQ	<LOQ
17.04.2017	17:59	E5	outlet	206.64	11.52	2.57	0.34	<LOQ	0.58	10.57	0.16	0.02	<LOQ	<LOQ	<LOQ
17.04.2017	18:28	E5	inlet	439.59	16.52	55.4	3.24	1.61	1.49	<LOQ	<LOQ	<LOQ	<LOQ	<LOQ	<LOQ
17.04.2017	18:29	E5	outlet	207.88	11.87	7.72	0.47	3.02	3.81	24.49	0.94	0.58	0.03	<LOQ	<LOQ
17.04.2017	19:29	E5	outlet	256.23	13.15	18.64	1.1	6.32	4.98	23.12	2.32	0.57	0.06	5.09	4.55
17.04.2017	22:28	E5	inlet	259.16	5.96	6.03	<LOQ	2.2	1.7	97.44	2.08	3.51	<LOQ	0.22	0.01
17.04.2017	23:29	E5	outlet	246.22	8.45	16.71	1.13	3.06	2.53	9.06	0.24	0.38	0.28	0.44	0.68
18.04.2017	04:28	E5	inlet	284.13	6.73	6.41	0.45	14.63	20.87	118.05	2.74	4.61	0.21	14	20.52
18.04.2017	05:29	E5	outlet	185.5	4.97	6.83	0.41	1.58	1.44	4.01	0.24	0.14	0.06	0.23	0.07
09.06.2017	20:39	E6	inlet	162.09	12.27	15.58	11.85	<LOQ	0.93	6.99	1.2	0.3	0.48	<LOQ	<LOQ
09.06.2017	21:08	E6	inlet	732.53	81.7	52.4	4.82	<LOQ	13.46	<LOQ	<LOQ	<LOQ	<LOQ	<LOQ	<LOQ
09.06.2017	21:38	E6	inlet	1074.05	175.01	30.26	5.2	<LOQ	5.94	<LOQ	<LOQ	<LOQ	<LOQ	<LOQ	<LOQ
09.06.2017	21:39	E6	outlet	255.86	21.39	10.78	3.11	<LOQ	2.75	3.65	0.6	0.15	0.01	<LOQ	0.17
09.06.2017	22:09	E6	outlet	531.44	47.81	20.34	3.53	<LOQ	2.63	16.76	1.87	0.46	0.31	<LOQ	1.09
09.06.2017	22:38	E6	inlet	1397.67	183.28	124.66	20.33	<LOQ	252.44	<LOQ	<LOQ	<LOQ	<LOQ	<LOQ	<LOQ
09.06.2017	22:39	E6	outlet	655.79	65.14	22.05	4.1	<LOQ	4.14	12.42	0.61	0.63	0.02	<LOQ	2.37
09.06.2017	23:39	E6	outlet	679.33	73.68	41.17	6.7	<LOQ	3.21	38.04	4.77	1.58	0.58	<LOQ	0.68
10.06.2017	02:28	E6	inlet	331.5	37.48	12.3	1.92	46.38	91.72	<LOQ	<LOQ	<LOQ	<LOQ	<LOQ	<LOQ
10.06.2017	03:39	E6	outlet	557.9	57.65	28.03	5.19	<LOQ	5.95	9.7	0.68	0.46	0.16	<LOQ	2.4
10.06.2017	08:28	E6	inlet	127.95	12.59	10.41	0.48	3.88	1.97	<LOQ	<LOQ	<LOQ	<LOQ	<LOQ	<LOQ
10.06.2017	09:39	E6	outlet	272.67	26.47	14.55	1.86	11.23	13.02	3.59	0.94	0.19	0.06	1.09	3.35
28.06.2017	01:35	E7	inlet	197.68	31.49	2.25	0.94	<LOQ	9.34	20.39	2.98	0.01	0.1	<LOQ	0.76
28.06.2017	02:05	E7	inlet	1771.52	151.58	4.59	0.81	<LOQ	4.91	<LOQ	<LOQ	<LOQ	<LOQ	<LOQ	<LOQ
28.06.2017	02:35	E7	inlet	1515.85	102.28	12.19	1.68	<LOQ	11.97	<LOQ	<LOQ	<LOQ	<LOQ	<LOQ	<LOQ
28.06.2017	02:36	E7	outlet	1408.01	65.61	2.25	0.76	<LOQ	6.04	97.67	4.84	0.14	0.03	<LOQ	3.31
28.06.2017	03:06	E7	outlet	2071.49	101.76	2.97	1.17	<LOQ	19.71	98.96	4.04	0.08	0.05	<LOQ	0.58
28.06.2017	03:35	E7	inlet	1775.21	88.72	394.09	7.96	33.48	26.53	361.46	12.51	6.59	0.37	<LOQ	15.1
28.06.2017	03:36	E7	outlet	1429.1	72.08	14.14	1.29	<LOQ	14.57	492.95	16.97	0.09	0.24	<LOQ	9.07
28.06.2017	04:36	E7	outlet	1351.16	76.29	121.46	2.92	4.3	10.51	414.93	20.88	14.2	0.75	<LOQ	3.93
28.06.2017	07:35	E7	inlet	1029.51	58.35	161.83	2.34	<LOQ	52.27	1.24	0.77	0.65	0.01	<LOQ	34.38
28.06.2017	08:36	E7	outlet	974.77	63.66	171.42	2.64	<LOQ	22.55	34.4	4.67	2.86	0.05	<LOQ	4.96
28.06.2017	13:35	E7	inlet	777.35	29.97	28.02	0.49	4.25	3.75	<LOQ	<LOQ	<LOQ	<LOQ	<LOQ	<LOQ
28.06.2017	14:36	E7	outlet	949.9	49.27	105.25	1.76	<LOQ	7.9	228.75	6.86	2.46	0.41	<LOQ	4.79
10.07.2017	20:08	E8	inlet	269.92	64.66	<LOQ	<LOQ	<LOQ	4.35	11.91	3.08	<LOQ	<LOQ	<LOQ	2.52
10.07.2017	20:37	E8	inlet	424.74	120.28	0.17	<LOQ	<LOQ	1.61	20.8	2.81	<LOQ	<LOQ	<LOQ	<LOQ
10.07.2017	21:07	E8	inlet	536.73	151.09	<LOQ	<LOQ	<LOQ	<LOQ	57.28	6.1	<LOQ	<LOQ	<LOQ	<LOQ
10.07.2017	21:08	E8	outlet	227.47	46.41	0.23	<LOQ	<LOQ	2.86	13.29	3.86	<LOQ	<LOQ	<LOQ	1.28
10.07.2017	21:38	E8	outlet	622.95	69.85	<LOQ	<LOQ	<LOQ	<LOQ	1.97	0.49	<LOQ	<LOQ	<LOQ	<LOQ
10.07.2017	22:07	E8	inlet	964.74	129.26	36.14	14.74	11.63	29.93	107.4	0.9	0.65	0.1	3.29	7.48
10.07.2017	22:08	E8	outlet	594.78	99.55	15.13	1.56	<LOQ	6.27	30.08	3.79	0.52	0.04	<LOQ	0.19
10.07.2017	23:08	E8	outlet	687.52	86.44	13.03	6.93	<LOQ	9.8	68.02	6.84	0.9	0.48	<LOQ	2.24
11.07.2017	02:07	E8	inlet	577.98	92.31	26.83	5.05	14.87	19.05	50.79	3.99	0.28	0.16	2.67	7.98
11.07.2017	03:08	E8	outlet	530.37	68.24	14.62	4.04	<LOQ	13.1	16.56	2.06	0.44	0.11	<LOQ	6.77
11.07.2017	08:07	E8	inlet	430.27	44.89	7.03	1.39	12.84	28.16	5.26	1.23	0.51	0.02	4.75	18.82
11.07.2017	09:08	E8	outlet	466.71	53.32	11.72	2.9	<LOQ	12.4	98.34	7.67	0.54	0.39	<LOQ	9
10.08.2017	03:10	E9	inlet													Instrument failure
10.08.2017	03:40	E9	inlet	1112.34	358.29	52.29	<LOQ	38.19	38.12	531.44	29.4	5.7	<LOQ	3.55	0.29
10.08.2017	04:10	E9	inlet	968.03	251.91	30.1	<LOQ	13.62	12.56	396.83	117.8	14.24	<LOQ	12.58	11.84
10.08.2017	04:11	E9	outlet	958.04	170.34	36.77	<LOQ	10.95	9.52	18.04	17.2	13.49	<LOQ	9.31	8.82
10.08.2017	04:41	E9	outlet	1010.95	191.19	67.59	<LOQ	<LOQ	2.03	371.29	84.82	5.97	<LOQ	<LOQ	0.23
10.08.2017	05:10	E9	inlet	1734.68	230.42	28.16	<LOQ	19.95	17.72	156.75	33.58	9.4	<LOQ	22.52	20.76
10.08.2017	05:11	E9	outlet	1027.85	150.71	26.56	<LOQ	19.39	19	149.29	5.61	8.42	<LOQ	23.8	23.15
10.08.2017	06:11	E9	outlet	800.01	271.5	20.63	<LOQ	12.98	11.81	165.17	75.66	4.81	<LOQ	13.27	11.99
10.08.2017	09:10	E9	inlet	822.57	143.16	41.06	<LOQ	32.21	30.5	417.44	72.87	18.29	<LOQ	41.3	40.08
10.08.2017	10:11	E9	outlet	723.12	130.96	32.15	<LOQ	<LOQ	<LOQ	359.11	1.9	1.18	<LOQ	<LOQ	<LOQ
10.08.2017	12:07	E9	inlet	685.46	95.65	82.92	<LOQ	36.46	29.06	312.1	21.32	40.11	<LOQ	48.94	39.86
10.08.2017	13:08	E9	outlet	593.02	100.63	69.98	<LOQ	<LOQ	1.41	260.16	6.63	1.24	<LOQ	<LOQ	0.81
18.08.2017	18:39	E10	inlet	176.11	30.07	28.24	<LOQ	32.65	28.3	12.96	0.76	0.24	<LOQ	2.06	5.75
18.08.2017	19:09	E10	inlet	526.46	59.94	23.87	<LOQ	<LOQ	7.47	82.92	38.82	7.05	<LOQ	<LOQ	9.07
18.08.2017	19:39	E10	inlet	506.23	135.78	21.72	5.66	<LOQ	5.25	193.88	73.88	4.25	1.38	<LOQ	4.04
18.08.2017	19:40	E10	outlet	78.65	20.71	4.59	<LOQ	<LOQ	<LOQ	5.25	0.77	1.47	<LOQ	<LOQ	<LOQ
18.08.2017	20:10	E10	outlet	198.71	27.58	7.07	<LOQ	<LOQ	<LOQ	3.71	4.28	1.91	<LOQ	<LOQ	<LOQ
18.08.2017	20:39	E10	inlet	392.89	108.06	27.28	<LOQ	19.95	13.72	23.44	2.98	8.35	<LOQ	11.27	8.69
18.08.2017	20:40	E10	outlet	311.18	44.11	6.46	<LOQ	<LOQ	<LOQ	37.75	6.82	2.6	<LOQ	<LOQ	<LOQ
18.08.2017	21:40	E10	outlet	195.32	66.78	11.63	<LOQ	<LOQ	14.63	29.24	18.6	1.09	<LOQ	<LOQ	18.43
19.08.2017	00:39	E10	inlet	362.68	82.05	9.75	1.44	10.31	5.06	54.06	4.76	3.56	0.22	2.05	0.97
19.08.2017	01:40	E10	outlet	235.62	52.1	12.41	<LOQ	<LOQ	<LOQ	116.59	3.63	1.25	<LOQ	<LOQ	<LOQ
19.08.2017	06:39	E10	inlet	313.84	38.77	13.78	<LOQ	11.74	13.27	39.82	12.88	2.14	<LOQ	0.19	0.5
19.08.2017	07:40	E10	outlet	236.95	39.51	9.68	2.34	<LOQ	<LOQ	6.37	0.06	0.14	0.82	<LOQ	<LOQ
