# Supplementary material for: Pesticide peak concentration reduction in a small vegetated treatment system controlled by chemograph shape
Source: Copernicus journal article supplement (doi:10.5194/hess-25-497-2021), 2021-02-02
Supplement: Supplementary file 1 [file hess-25-497-2021-supplement.zip › Data_GrabSampling.csv]

Date	Time	ID	Sampling Point	bos [ng/L]	pen [ng/L]	met [ng/L]	flu [ng/L]	met-ESA [ng/L]	met-OA [ng/L]	bos_sd [ng/L]	pen_sd [ng/L]	met_sd [ng/L]	flu_sd [ng/L]	met-ESA_sd [ng/L]	met-OA_sd [ng/L]
27.05.2016	13:55	B1	out	2.09	<LOQ	<LOQ	<LOQ	60.57	56.03	0.03	<LOQ	<LOQ	<LOQ	1.58	8.01
27.05.2016	14:15	B1	in	2.33	<LOQ	<LOQ	<LOQ	69.82	60.94	0.21	<LOQ	<LOQ	<LOQ	5.18	4.14
09.06.2016	13:05	B2	out	23.71	2.56	<LOQ	<LOQ	19.24	45.32	1.16	0.08	<LOQ	<LOQ	9.09	6
09.06.2016	13:32	B2	in	21.13	4.33	<LOQ	<LOQ	11.69	38.92	0.6	0.82	<LOQ	<LOQ	0.96	0.33
25.07.2016	09:45	B3	in	27.81	5.6	3.15	<LOQ	4.99	2.22	1.09	0.33	0.09	<LOQ	0.57	0.49
25.07.2016	10:15	B3	out	35.4	6.15	5.33	<LOQ	6.67	3.98	2.06	0.8	0.58	<LOQ	0.75	0.89
05.10.2016	10:40	B4	out	28.05	<LOQ	0.32	<LOQ	0.79	<LOQ	0.43	<LOQ	0.08	<LOQ	0.33	<LOQ
05.10.2016	11:13	B4	in	30.27	0.82	<LOQ	53.57	7.28	4.38	1.03	0.21	<LOQ	3.18	4.29	2.93
05.12.2016	09:40	B5	in	7.56	<LOQ	<LOQ	<LOQ	<LOQ	10.2	<LOQ	<LOQ	<LOQ	<LOQ	<LOQ	<LOQ
05.12.2016	09:55	B5	out	6.76	<LOQ	<LOQ	<LOQ	<LOQ	<LOQ	0.9	<LOQ	<LOQ	<LOQ	<LOQ	<LOQ
