# Supplementary material for: Pesticide peak concentration reduction in a small vegetated treatment system controlled by chemograph shape
Source: Copernicus journal article supplement (doi:10.5194/hess-25-497-2021), 2021-02-02
Supplement: Supplementary file 1 [file hess-25-497-2021-supplement.zip › Figure_S1_MassFlux.pdf]

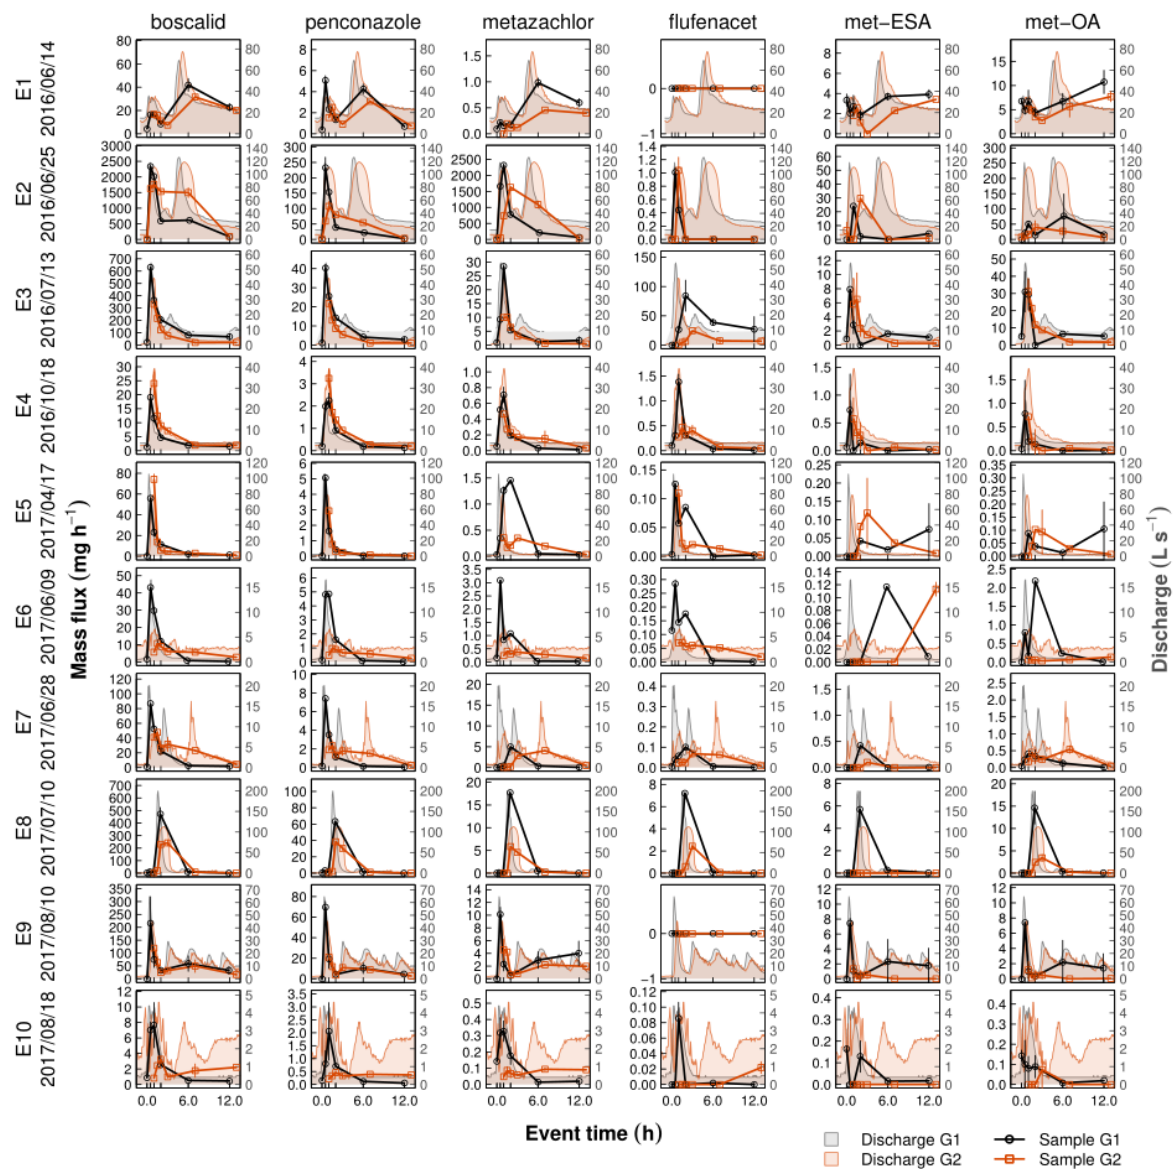

**Figure S1: Contaminant mass flux at the inlet gauge G1 and the outlet gauge G2 of the 6 target compounds during 10 discharge events. Data points represent means of duplicate samples and standard deviation (error bars).**
