# Supplementary material for: Pesticide peak concentration reduction in a small vegetated treatment system controlled by chemograph shape
Source: Copernicus journal article supplement (doi:10.5194/hess-25-497-2021), 2021-02-02
Supplement: Supplementary file 1 [file hess-25-497-2021-supplement.zip › hess-25-497-2021-supplement-title-page.pdf]

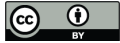

## *Supplement of*

# **Pesticide peak concentration reduction in a small vegetated treatment system controlled by chemograph shape**

**Jan Greiwe et al.**

*Correspondence to:* Jan Greiwe ([jan.greiwe@hydrology.uni-freiburg.de](mailto:jan.greiwe@hydrology.uni-freiburg.de))

- [hess-25-497-2021-supplement-title-page.pdf](#)
- [Data\\_Discharge\\_G1\\_5Min.csv](#)
- [Data\\_Discharge\\_G2\\_5Min.csv](#)
- [Data\\_FlowEvents.csv](#)
- [Data\\_GrabSampling.csv](#)
- [Figure\\_S1\\_MassFlux.pdf](#)
- [Text\\_S1.pdf](#)

The copyright of individual parts of the supplement might differ from the CC BY 4.0 License.
